# Supplementary material for: Ligand release from silicon phthalocyanine dyes triggered by X-ray irradiation
Source: Royal Society of Chemistry journal article supplement (doi:10.1039/d2ob00957a), 2022-01-01
Supplement: d2ob00957a1.pdf [file d2ob00957a1.pdf]

## Supporting Information

### Ligand release of silicon phthalocyanine dyes triggered by X-ray irradiation

*Hideo Takakura,<sup>a</sup> Shino Matsuihiro,<sup>a</sup> Osamu Inanami,<sup>b</sup> Masato Kobayashi,<sup>c,d</sup> Kenichiro Saita,<sup>c</sup> Masaki Yamashita,<sup>a</sup> Kohei Nakajima,<sup>a</sup> Motofumi Suzuki,<sup>a</sup> Naoki Miyamoto,<sup>e</sup> Tetsuya Taketsugu,<sup>c,d</sup> Mikako Ogawa<sup>\*a</sup>*

<sup>a</sup> Graduate School of Pharmaceutical Sciences, Hokkaido University, Sapporo, Hokkaido, Japan

<sup>b</sup> Graduate School of Veterinary Medicine, Hokkaido University, Sapporo, Hokkaido, Japan

<sup>c</sup> Department of Chemistry, Faculty of Science, Hokkaido University, Sapporo, Hokkaido, Japan

<sup>d</sup> WPI-ICReDD, Hokkaido University, Sapporo, Hokkaido, Japan

<sup>e</sup> Division of Quantum Science and Engineering, Faculty of Engineering, Hokkaido University, Sapporo, Hokkaido, Japan

\* Correspondence: [mogawa@pharm.hokudai.ac.jp](mailto:mogawa@pharm.hokudai.ac.jp)

## MATERIALS AND METHODS

### *Reagents and general information*

Compounds **1-4** were synthesized according to literature methods.<sup>[1]</sup> General chemicals were of the best grade available, supplied by FUJIFILM Wako Pure Chemical Corporation (Osaka, Japan), Tokyo Chemical Industries Co, Ltd. (Tokyo, Japan), KANTO CHEMICAL Co., INC. (Tokyo, Japan) and Sigma-Aldrich Co. LLC (St. Louis, MO, USA), and were used without further purification. MALDI-TOF mass spectra (MS) were recorded with an AB SCIEX TOF/TOF 5800 mass spectrometer (Tokyo, Japan), High performance liquid chromatography (HPLC) analyses were carried out on an HPLC system (Shimadzu Corporation, Kyoto, Japan) equipped with reverse-phase columns, Inertsil ODS-3 (4.6 mm × 250 mm) (GL Sciences Inc., Tokyo, Japan), using eluent A (0.1 M triethylammonium acetic acid (TEAA)) and eluent B (99% CH<sub>3</sub>CN/1% H<sub>2</sub>O). X-rays were generated by a CLINAC (Varian Medical Systems, Palo Alto, CA, USA) or an X-Rad iR-225 (Precision X-Ray, North Branford, CT, USA).

### *X-ray irradiation of phthalocyanine derivatives*

For irradiation with CLINAC, a 5 μM solution of compounds **1-4** in 0.1 M phosphate buffer (pH7.0) without or with 0.1 M HCOONa was prepared in a vial. The solution was bubbled with Ar or N<sub>2</sub>O gas through the septum cap of the sealed vial to remove oxygen. For irradiation with the X-Rad iR-225, a 500 μM solution of compound **1-4** in 0.1 M phosphate buffer (pH7.0) without or with 1 M HCOONa was filled into a gas-permeable polymethylpentene (TPXTM) tube (0.76 mm I.D. × 1.0 O.D. × 60 mm long, Toho Kasei Sangyo Co.,Ltd, Tokyo, Japan), which was then sealed at both end; this TPX tube was then placed into a 5φ ESR tube (5 mm O.D. × 250 mm long, S-5-ESR-250S, Norell Inc., Morganton, NC, USA). Ar or N<sub>2</sub>O gas was supplied to the ESR tube through a long capillary glass tube to remove oxygen from the sample, and the tube was subsequently sealed.

After the samples were prepared, each solution was irradiated using the CLINAC or X-Rad iR-225. The irradiated solution was analyzed by HPLC (eluent A/eluent B = 75/25 to 60/40 in 5 min, 60/40 to 0/100 in 10 min for compound **2**; eluent A/eluent B = 80/20 to 0/100 in 10 min for compounds **1, 3** and **4**). Methylene blue (MB) was used as an internal standard. X-rays were generated using the X-Rad iR-225 at a dose rate of 210 Gy/min, if not otherwise described. All the experiments were carried out at room temperature. Fig. 3e, Fig. 4a, and Fig. 5b were made from single measurement. Data in Fig. 3b represents the mean (n = 2). Data in Fig. 4b and Fig. 5d represents the mean ± SEM (n = 3 or 4).

For MS analysis, a solution of 5 μM compound **2** in 0.1 M sodium phosphate buffer (pH7.0) with 0.1 M HCOONa was prepared with [<sup>18</sup>O]H<sub>2</sub>O (Taiyo Nippon Sanso Corp., Tokyo, Japan) or H<sub>2</sub>O. The solution was bubbled with Ar through the septum cap of the sealed vial. The solution was then irradiated using the CLINAC at 20 Gy. After irradiation, the solution was analyzed by MALDI-TOF

MS.

#### *ESR measurement*

As previously described, 5φ ESR quartz tube with a TPX capillary tube containing a phthalocyanine derivative solution (0.1 M phosphate buffer pH 7.0) with 1 M HCOONa was sealed under Ar or N<sub>2</sub>O gas. The ESR measurement area at the bottom of the ESR quartz tube was covered by a lead plate and shielded against the scatter X-rays, and the TPX capillary tube containing the sample was placed on the opposite side of the quartz tube such that only the TPX capillary tube was irradiated with X-rays. This configuration was used to avoid undesired glass-derived radicals in the measurement area of the ESR quartz tube as a result of X-ray irradiation.

After compounds **1-4** were exposed to 210 Gy X-rays at room temperature, the TPX tube was quickly moved to the bottom of the ESR quartz tube and placed in the ESR cavity, where the temperature was maintained at 110 K using a temperature controller (ES-DVT3; JEOL, Tokyo, Japan); ESR spectra of the frozen-samples were then recorded. In the case of analysis of the decay kinetics of anion radicals in compound **2**, the ESR quartz tube containing the sample was placed in the ESR cavity at room temperature immediately after irradiation, and ESR spectra at 298 K were recorded 2.5, 5, 10, 15, and 30 min after X-ray irradiation. All ESR spectra were recorded using a JEOL-RE1X spectrometer. The EPR parameters were as follows: incident microwave power, 10 mW; microwave frequency, 9.4335 GHz; modulation frequency, 100 kHz; field modulation amplitude, 0.1 mT; time constant, 0.3 s; scan range, 336.79 ± 5 mT; sweep time, 8 min/10 mT; receiver gain, 5.0 × 10<sup>2</sup>. The line width, intensity, and g-value of the EPR signal were estimated using the signal of a co-mounted Mn<sup>2+</sup> marker (ES-DM1; JEOL) in the cavity and the Win-Rad software (Radical Research, Tokyo, Japan). The concentration of IR700 anion radicals was estimated using a standard curve created by the double integration of the EPR signals of DPPH in methanol.

#### *Quantum chemical calculation*

All density functional theory (DFT) calculations were performed using Gaussian16<sup>[2]</sup> with the long-range and dispersion corrected ωB97X-D functional.<sup>[3]</sup> The spin-unrestricted self-consistent field calculations were performed for singlet-state calculations. The aug-cc-pVDZ basis set<sup>[4]</sup> was adopted for N and O atoms, whereas the cc-pVDZ basis set<sup>[5,6]</sup> was used for all other atoms. The water solvent effect was considered using the integral equation formalism variant of the polarizable continuum model (IEFPCM).<sup>[7]</sup> The normal mode analyses were performed at the optimized structures to confirm the stability, whereas the thermally corrected Gibbs energies at 298.15 K and 1 atm were evaluated using Grimme's qRRHO approximation<sup>[8]</sup> implemented in the Goodvibes program.<sup>[9]</sup>

## SUPPORTING DATA

Molecular geometry (.xyz) files containing optimized molecular coordinates by the quantum chemical calculation and its energy are available via the following website: [https://github.com/k-masato/SiPc\\_X-ray\\_structures](https://github.com/k-masato/SiPc_X-ray_structures). The data are also shown below.

Geometry optimized cartesian coordinates of SiPc(OX)<sub>2</sub> of compound **1** (neutral).

E=-7641.668735 (radical: -7641.805457) / qh-G(298.15K)=-7640.411472 (wB97X-D/(aug-)cc-pVDZ, water solv.)

```
Si -0.0000631753 -0.4377077828 -0.0000256492
C 0.5155202385 -6.9461357363 -0.4795842934
C 1.0443861193 -5.7585804706 -0.9733241723
C 0.5109762645 -4.5687035807 -0.4761574749
C -0.5119580258 -4.5686250617 0.4758344522
C -1.045616813 -5.7584219692 0.9729306819
C -0.5170057077 -6.9460578293 0.4791120766
C 0.7937924451 -3.1755293815 -0.7699543711
N -0.0002292349 -2.3686260569 -0.0000567598
C -0.7944360428 -3.1754075817 0.7697637984
N 1.639796994 -2.8084228526 -1.7125442079
C 1.802252521 -1.5472434611 -2.0566533831
N -1.2401799004 -0.4394961228 1.4785336245
C -1.6564004861 0.6605381341 2.1768835359
C -2.5199412441 0.2470340122 3.2698922838
C -2.62038532 -1.144645524 3.1871808126
C -1.8025282707 -1.5470015262 2.0565964014
C -3.194527067 0.9673730658 4.2573207058
C -3.9809257952 0.2448781913 5.1477630169
C -4.0780439738 -1.1585775513 5.0666360321
C -3.3930861778 -1.8748907427 4.0913165816
N -1.6403330047 -2.8081902281 1.7124207951
C 2.6203238902 -1.1449780123 -3.187099931
C 2.520255015 0.2467401285 -3.2696740031
C 1.6566640138 0.6603470196 -2.1767546434
```

|    |               |               |               |
|----|---------------|---------------|---------------|
| N  | 1.2400863537  | -0.4396532156 | -1.4785589753 |
| C  | 3.3929278673  | -1.8753315784 | -4.0912373108 |
| C  | 4.0781737424  | -1.1591001063 | -5.0664083405 |
| C  | 3.9814294019  | 0.2443925338  | -5.1474010005 |
| C  | 3.1951268159  | 0.9669998218  | -4.2569696174 |
| N  | 1.3865198154  | 1.9274788935  | -1.9247376917 |
| N  | 0.0000956348  | 1.4930789709  | -0.0000042999 |
| C  | 0.6330289767  | 2.2977126845  | -0.9077731565 |
| C  | 0.3899950316  | 3.6946131619  | -0.5804472609 |
| C  | -0.389519913  | 3.694641349   | 0.5804860019  |
| C  | -0.6326728536 | 2.2977682073  | 0.9078084537  |
| C  | 0.7868365638  | 4.8841980437  | -1.1900050397 |
| C  | 0.3855492887  | 6.0734405234  | -0.5881006096 |
| C  | -0.3848856549 | 6.0734636961  | 0.5881866484  |
| C  | -0.7862854376 | 4.8842434593  | 1.1900607409  |
| N  | -1.3860807792 | 1.9276270095  | 1.9248821108  |
| H  | 1.3886500102  | 4.8904726769  | -2.0990619183 |
| H  | 0.9049991853  | -7.8992537523 | -0.8399611994 |
| H  | 1.8430827541  | -5.7521102214 | -1.7153829294 |
| H  | -1.8443059365 | -5.7518291115 | 1.714995166   |
| H  | -0.9066820408 | -7.899115767  | 0.8394336511  |
| H  | -3.1101405294 | 2.0526140211  | 4.3205603343  |
| H  | -4.530030793  | 0.771085376   | 5.92943599    |
| H  | -4.7001111663 | -1.6905673412 | 5.7874047306  |
| H  | -3.4548681225 | -2.9615405559 | 4.0300570048  |
| H  | 3.4544270184  | -2.9620033835 | -4.0300733993 |
| H  | 4.7001753419  | -1.6911771916 | -5.7871696115 |
| H  | 4.5307469341  | 0.7705346391  | -5.9289688432 |
| H  | 3.1110278887  | 2.0522685451  | -4.3201099875 |
| H  | 0.6788238416  | 7.0247321892  | -1.0341124229 |
| H  | -0.6780857963 | 7.024773452   | 1.0342095413  |
| H  | -1.3881537099 | 4.8905456146  | 2.09908272    |
| O  | -1.3478269227 | -0.3980412905 | -1.0875168225 |
| Si | -1.9273999783 | -0.9832997969 | -2.5550327904 |
| C  | -3.651080665  | -0.2572300958 | -2.8085973876 |
| C  | -4.6180291804 | -0.5015021009 | -1.6375601591 |

|   |               |               |               |
|---|---------------|---------------|---------------|
| C | -4.6074661805 | 0.7006551951  | -0.7083842407 |
| N | -5.5898320543 | 0.6530101364  | 0.4401587003  |
| C | -7.0387461157 | 0.7442423841  | -0.001411925  |
| C | -7.4150458869 | 1.8230437975  | -1.0237221957 |
| C | -7.3766717272 | 1.4485205345  | -2.5051833849 |
| S | -8.5091176292 | 0.1126044805  | -2.9797461162 |
| O | -9.8549843166 | 0.5005135781  | -2.4339246262 |
| O | -8.4614535362 | 0.076153542   | -4.4806107193 |
| O | -7.969094263  | -1.1461992718 | -2.3489120792 |
| C | -5.3708007237 | -0.6305165862 | 1.238713115   |
| C | -6.1388597723 | -1.8801899709 | 0.818434344   |
| C | -5.4713231928 | -3.0890018926 | 1.4648267937  |
| S | -6.195593064  | -4.6529534424 | 0.9126857885  |
| O | -5.4205627393 | -5.7156972016 | 1.6410486806  |
| O | -7.6465222485 | -4.6056354705 | 1.306019786   |
| O | -5.9937728039 | -4.6921461155 | -0.5773130337 |
| C | -5.2347988754 | 1.7571545859  | 1.4209661568  |
| C | -5.2464513382 | 3.2025068172  | 0.9428111807  |
| C | -4.490344241  | 4.0374826963  | 1.9703159228  |
| S | -4.6600954731 | 5.8133324635  | 1.6650648591  |
| O | -4.2575583293 | 6.0317603002  | 0.2331514128  |
| O | -3.7331122176 | 6.4675608509  | 2.6511868533  |
| O | -6.1090232722 | 6.1319351174  | 1.9157234421  |
| C | -0.8782098916 | -0.4661349125 | -4.0269469368 |
| C | -2.0992825402 | -2.8583742057 | -2.5108103633 |
| H | -2.696979947  | -3.1894161669 | -3.3745468177 |
| H | -2.6093422774 | -3.1979759294 | -1.595193055  |
| H | -1.1241618269 | -3.3645604833 | -2.570749469  |
| H | -3.5815207041 | 0.8176011889  | -3.0492455018 |
| H | -4.0461993314 | -0.7404041588 | -3.717450913  |
| H | -5.6368834039 | -0.6934570991 | -2.0021121577 |
| H | -4.3100424923 | -1.4023132956 | -1.0861385427 |
| H | -3.6103221005 | 0.8186501677  | -0.2590347579 |
| H | -4.8255783892 | 1.6144531627  | -1.2717400433 |
| H | -7.603073367  | 0.8945708218  | 0.9270173906  |
| H | -7.3136302122 | -0.2316489881 | -0.4103577714 |

|    |               |               |               |
|----|---------------|---------------|---------------|
| H  | -6.8253389349 | 2.7375376796  | -0.8999387034 |
| H  | -8.4487267483 | 2.1090551508  | -0.7824556381 |
| H  | -7.6997158433 | 2.3116968187  | -3.1023486134 |
| H  | -6.3868331851 | 1.1444960708  | -2.8697428176 |
| H  | -5.6105632274 | -0.3965041972 | 2.2834512308  |
| H  | -4.2903606821 | -0.8086625344 | 1.18106992    |
| H  | -6.1458364317 | -2.018285493  | -0.2687102448 |
| H  | -1.4586345184 | -0.6364420089 | -4.9475153244 |
| H  | -7.1838654458 | -1.8185763103 | 1.1500165634  |
| H  | -5.5667688252 | -3.0785058073 | 2.5592287648  |
| H  | -4.4039622375 | -3.1593636561 | 1.2042325205  |
| H  | -5.9235556486 | 1.6420663588  | 2.2675871297  |
| H  | -4.2282824906 | 1.5015088516  | 1.7727877174  |
| H  | -4.756176662  | 3.3227597944  | -0.0321663644 |
| H  | -6.275487475  | 3.5765887821  | 0.8636812151  |
| H  | 0.0523765381  | -1.0457357693 | -4.1139566764 |
| H  | -4.8696834822 | 3.8809837026  | 2.9905315639  |
| H  | -3.4142549178 | 3.8136687154  | 1.9533831296  |
| H  | -0.6251152451 | 0.6046136658  | -3.9811195523 |
| O  | 1.3476150234  | -0.3981744787 | 1.0875706329  |
| Si | 1.9277916289  | -0.9847049806 | 2.5543281264  |
| C  | 3.6508810525  | -0.2574849453 | 2.808523892   |
| C  | 4.6182338309  | -0.5012496601 | 1.6377045169  |
| C  | 4.6074841428  | 0.7009354352  | 0.7085729115  |
| N  | 5.5898063175  | 0.6533721404  | -0.4400155601 |
| C  | 7.0387380242  | 0.744570014   | 0.0015212023  |
| C  | 7.4150506036  | 1.8231694959  | 1.0240442418  |
| C  | 7.3767436981  | 1.4483376309  | 2.5054297877  |
| S  | 8.5091699111  | 0.112286163   | 2.9796618172  |
| O  | 9.8550086294  | 0.5002260438  | 2.4337913513  |
| O  | 8.4616366468  | 0.0755724203  | 4.4805243029  |
| O  | 7.9690275079  | -1.1463804472 | 2.3486569371  |
| C  | 5.3707393662  | -0.630107282  | -1.2386553542 |
| C  | 6.1388631134  | -1.8798039225 | -0.8185362366 |
| C  | 5.4711679501  | -3.0886112217 | -1.4647726965 |
| S  | 6.195379568   | -4.6525797883 | -0.9126196207 |

|   |              |               |               |
|---|--------------|---------------|---------------|
| O | 5.4201597613 | -5.7153104327 | -1.6407997094 |
| O | 7.6462586414 | -4.6054077752 | -1.3061562138 |
| O | 5.9937621667 | -4.6916474322 | 0.5774091506  |
| C | 5.2347235785 | 1.757584153   | -1.420731119  |
| C | 5.2465163271 | 3.2029074653  | -0.9425180797 |
| C | 4.4904957641 | 4.0379785497  | -1.9700013771 |
| S | 4.6602553507 | 5.8138062425  | -1.6646153634 |
| O | 4.2576336251 | 6.0321343338  | -0.2327102795 |
| O | 3.7333332598 | 6.4681113459  | -2.6507422907 |
| O | 6.1092000443 | 6.1324175389  | -1.9151700735 |
| C | 0.8782269461 | -0.4702070747 | 4.0269044978  |
| C | 2.1012213353 | -2.8595980642 | 2.5078633899  |
| H | 2.7002244505 | -3.1911176125 | 3.3705106185  |
| H | 2.6104314495 | -3.1977784187 | 1.5912504448  |
| H | 1.1265726824 | -3.3666382439 | 2.5683801248  |
| H | 3.5805494884 | 0.8173079996  | 3.0491083698  |
| H | 4.0460724289 | -0.7403927434 | 3.7174826815  |
| H | 5.6370678552 | -0.6929193547 | 2.0024628607  |
| H | 4.3106895116 | -1.4021144982 | 1.0861412507  |
| H | 3.6103061647 | 0.8187948927  | 0.2592551328  |
| H | 4.8255053317 | 1.6147743892  | 1.2719047746  |
| H | 7.6030326772 | 0.8950872021  | -0.9268986177 |
| H | 7.3136591181 | -0.2313906349 | 0.4102697657  |
| H | 6.8253097544 | 2.7376689012  | 0.9004836389  |
| H | 8.4487123125 | 2.1092658848  | 0.7827970966  |
| H | 7.6998378027 | 2.3113822073  | 3.1027577361  |
| H | 6.3869152664 | 1.1442647616  | 2.8699743168  |
| H | 5.6104021526 | -0.396014695  | -2.2833970935 |
| H | 4.2903070947 | -0.8082817755 | -1.1809317761 |
| H | 6.1460674323 | -2.0179000406 | 0.2686065855  |
| H | 1.4585831506 | -0.6417680684 | 4.9472828956  |
| H | 7.1838001851 | -1.8182078895 | -1.1503361429 |
| H | 5.5664676344 | -3.0781866001 | -2.5591868339 |
| H | 4.4038321565 | -3.1588783193 | -1.2040461795 |
| H | 5.9233758706 | 1.6424987296  | -2.2674376435 |
| H | 4.2281453261 | 1.5020138071  | -1.7724377902 |



|   |               |              |               |
|---|---------------|--------------|---------------|
| H | 4.7562441074  | 3.3231670128 | 0.0324627898  |
| H | 6.2755838316  | 3.5768975746 | -0.8633765252 |
| H | -0.0521575468 | -1.050287892 | 4.1128681902  |
| H | 4.8698803527  | 3.8815353543 | -2.9902077418 |
| H | 3.4144033389  | 3.8141993213 | -1.9531367543 |
| H | 0.6247505015  | 0.6005203976 | 3.9827512153  |

Geometry optimized cartesian coordinates of SiPc(OX)<sub>2</sub> of compound **1** (radical).

E=-7641.812208 / qh-G(298.15K)=-7640.556707 (wB97X-D/(aug-)cc-pVDZ, water solv.)

|    |               |               |               |
|----|---------------|---------------|---------------|
| Si | 0.0002329381  | -0.3926689618 | 0.0019722662  |
| C  | -0.5357678112 | -6.9144419427 | 0.4727931732  |
| C  | -1.0792434119 | -5.7207026316 | 0.9435427705  |
| C  | -0.5276949854 | -4.5338880736 | 0.4662220842  |
| C  | 0.5242994936  | -4.5361248113 | -0.4464541175 |
| C  | 1.0747292527  | -5.7252730409 | -0.9192372244 |
| C  | 0.5301279616  | -6.9166934584 | -0.4439346376 |
| C  | -0.8180808353 | -3.1318886137 | 0.7651204644  |
| N  | -0.0006626038 | -2.3213226453 | 0.0056634196  |
| C  | 0.8160013922  | -3.1355493664 | -0.750701933  |
| N  | -1.6637905132 | -2.7849514313 | 1.6910530814  |
| C  | -1.816253324  | -1.4999384952 | 2.0586048558  |
| N  | 1.2549506171  | -0.39959021   | -1.4719209285 |
| C  | 1.670672345   | 0.6992954184  | -2.1782228131 |
| C  | 2.5166515121  | 0.2866782367  | -3.2543222266 |
| C  | 2.6079844793  | -1.1175500363 | -3.1734953567 |
| C  | 1.8156868382  | -1.5094714043 | -2.0504041703 |
| C  | 3.211151957   | 0.9990934652  | -4.2494632799 |
| C  | 3.9887475622  | 0.2782798293  | -5.1367017982 |
| C  | 4.0712441507  | -1.1373057538 | -5.062103464  |
| C  | 3.3830459053  | -1.8455506715 | -4.0945516777 |
| N  | 1.6620260013  | -2.7929363302 | -1.6779453117 |
| C  | -2.6081872953 | -1.102991931  | 3.1801964909  |
| C  | -2.5155585778 | 0.3014460652  | 3.2556525734  |
| C  | -1.6692005217 | 0.7091679489  | 2.1779717827  |
| N  | -1.2544925772 | -0.3927923836 | 1.4758827678  |
| C  | -3.3839125118 | -1.82675072   | 4.1040253485  |

|    |               |               |               |
|----|---------------|---------------|---------------|
| C  | -4.0714488407 | -1.1141736216 | 5.0688682557  |
| C  | -3.9876455074 | 0.3016054496  | 5.1380526995  |
| C  | -3.2093909151 | 1.0183045265  | 4.2480564788  |
| N  | -1.3858226007 | 1.9987104247  | 1.9185430029  |
| N  | 0.001110352   | 1.5352286345  | -0.0017129329 |
| C  | -0.6358323705 | 2.3465837903  | 0.911838706   |
| C  | -0.3839931747 | 3.7492994994  | 0.5745251105  |
| C  | 0.3881446938  | 3.7467221618  | -0.5865096502 |
| C  | 0.6387678028  | 2.3425006823  | -0.9184045935 |
| C  | -0.7761526564 | 4.9394066057  | 1.1824189468  |
| C  | -0.3784272811 | 6.1314503521  | 0.5787562414  |
| C  | 0.3845987649  | 6.128842655   | -0.599980258  |
| C  | 0.7813065074  | 4.9341282011  | -1.199019143  |
| N  | 1.3884458001  | 1.9900831964  | -1.9237444128 |
| H  | -1.3741760119 | 4.9447944017  | 2.094291527   |
| H  | -0.9414779885 | -7.8656685049 | 0.8210086649  |
| H  | -1.9056274344 | -5.7110835968 | 1.655160693   |
| H  | 1.9011268468  | -5.7191534919 | -1.6308802622 |
| H  | 0.9349409607  | -7.8696236999 | -0.7885155069 |
| H  | 3.1406919983  | 2.0864772733  | -4.3084291197 |
| H  | 4.5456696074  | 0.8011019191  | -5.9160406038 |
| H  | 4.6876006608  | -1.671162172  | -5.7873585988 |
| H  | 3.4369644403  | -2.9336607214 | -4.0393537624 |
| H  | -3.4388374919 | -2.9150139632 | 4.0529871759  |
| H  | -4.6882928327 | -1.6446839671 | 5.7961612966  |
| H  | -4.5440790335 | 0.8279183554  | 5.9153881688  |
| H  | -3.1379345664 | 2.1058408229  | 4.3028530225  |
| H  | -0.6698260934 | 7.0830975813  | 1.0261530914  |
| H  | 0.6767966298  | 7.0785012641  | -1.0510682437 |
| H  | 1.3792876631  | 4.9354576299  | -2.1109331257 |
| O  | 1.3553069121  | -0.3497323639 | 1.1105271956  |
| Si | 1.8706994111  | -0.9229085077 | 2.596987449   |
| C  | 3.6418402522  | -0.3073374171 | 2.8518752592  |
| C  | 4.574214735   | -0.5557916367 | 1.6557622048  |
| C  | 4.5494938009  | 0.6523348556  | 0.7336172275  |
| N  | 5.522904147   | 0.6142105568  | -0.4220907666 |

|   |              |               |               |
|---|--------------|---------------|---------------|
| C | 6.9742263834 | 0.6938264572  | 0.0091197538  |
| C | 7.3617181969 | 1.757520013   | 1.0437799639  |
| C | 7.3427155854 | 1.3594462224  | 2.5194609594  |
| S | 8.4917206614 | 0.0268820368  | 2.9617219783  |
| O | 9.8292980517 | 0.4363473475  | 2.4104621825  |
| O | 8.4590875046 | -0.0335321709 | 4.4625899805  |
| O | 7.9585784541 | -1.2273553691 | 2.3166480344  |
| C | 5.2877305503 | -0.6590775646 | -1.232910576  |
| C | 6.0557837496 | -1.9165481776 | -0.8378056629 |
| C | 5.3936813799 | -3.1085969296 | -1.5205580782 |
| S | 6.0985840613 | -4.68723296   | -0.9909241917 |
| O | 5.3350210262 | -5.7302886677 | -1.7601320392 |
| O | 7.5588147494 | -4.6410298329 | -1.3513084339 |
| O | 5.8660139119 | -4.7636949097 | 0.4937457303  |
| C | 5.1639702489 | 1.730146957   | -1.3876090213 |
| C | 5.2101370481 | 3.1723106572  | -0.9031077684 |
| C | 4.4734119178 | 4.0264168289  | -1.929582823  |
| S | 4.6983765121 | 5.7968111316  | -1.6320754506 |
| O | 4.3021309051 | 6.0364854245  | -0.201335518  |
| O | 3.7950606384 | 6.4785624131  | -2.6220111127 |
| O | 6.1573368299 | 6.0704123543  | -1.8817196927 |
| C | 0.8606191833 | -0.2916089163 | 4.0524510513  |
| C | 1.9277949181 | -2.8070868169 | 2.6361312728  |
| H | 2.4845540781 | -3.1395841319 | 3.5264977967  |
| H | 2.4325353295 | -3.2143553013 | 1.7453598276  |
| H | 0.9195826143 | -3.2439413907 | 2.689470127   |
| H | 3.6405696535 | 0.760220395   | 3.1331907676  |
| H | 4.0248576913 | -0.8469328455 | 3.733996455   |
| H | 5.6006350195 | -0.7607265743 | 1.9915587064  |
| H | 4.2402674975 | -1.4498923069 | 1.1075919247  |
| H | 3.5477600942 | 0.7653312216  | 0.2933375029  |
| H | 4.7688655577 | 1.5640669     | 1.3005322602  |
| H | 7.5328721535 | 0.854810947   | -0.9211187222 |
| H | 7.2499825325 | -0.2882065679 | 0.4023727014  |
| H | 6.7659798639 | 2.6709050985  | 0.9435735073  |
| H | 8.3909975341 | 2.052645066   | 0.7947105986  |

|    |               |               |               |
|----|---------------|---------------|---------------|
| H  | 7.6648288248  | 2.2157624327  | 3.1270042243  |
| H  | 6.3593163584  | 1.0406256246  | 2.8887430428  |
| H  | 5.5143128144  | -0.4140195326 | -2.2780334077 |
| H  | 4.2072800462  | -0.8332384203 | -1.1671371985 |
| H  | 6.052753672   | -2.0810655181 | 0.245683823   |
| H  | 1.4217741534  | -0.4814059422 | 4.9816324072  |
| H  | 7.1036488301  | -1.8473869913 | -1.1591371947 |
| H  | 5.5095407468  | -3.0746559629 | -2.6124009392 |
| H  | 4.3201779097  | -3.1764108919 | -1.2852166103 |
| H  | 5.8344728421  | 1.6104132215  | -2.2481615805 |
| H  | 4.1467664321  | 1.4918597434  | -1.719870553  |
| H  | 4.7218756609  | 3.299637313   | 0.0722047362  |
| H  | 6.2471769561  | 3.5236708026  | -0.8225866232 |
| H  | -0.1136985645 | -0.793965249  | 4.1389652042  |
| H  | 4.8455766625  | 3.8559602951  | -2.9503870063 |
| H  | 3.3918276986  | 3.8304754962  | -1.9100195102 |
| H  | 0.6877159709  | 0.7931166949  | 3.9738947541  |
| O  | -1.3548080759 | -0.3527214967 | -1.1067345279 |
| Si | -1.8707424207 | -0.9310976782 | -2.5909903043 |
| C  | -3.6413148329 | -0.3148631017 | -2.8482139183 |
| C  | -4.5739034063 | -0.5578974742 | -1.6511535008 |
| C  | -4.5480775588 | 0.6537186331  | -0.733628762  |
| N  | -5.521524175  | 0.6208986668  | 0.42221197    |
| C  | -6.9727716646 | 0.7002318078  | -0.0093022707 |
| C  | -7.3592561196 | 1.7603233105  | -1.0480273604 |
| C  | -7.340625477  | 1.3565868543  | -2.5221739809 |
| S  | -8.4908519556 | 0.0233943066  | -2.9593345966 |
| O  | -9.8280506461 | 0.4361889709  | -2.4096409137 |
| O  | -8.4582813389 | -0.0427866998 | -4.4599606913 |
| O  | -7.958856363  | -1.2288578333 | -2.3094731025 |
| C  | -5.2875379383 | -0.6495101297 | 1.2378773253  |
| C  | -6.0567441595 | -1.907769812  | 0.8475525705  |
| C  | -5.3956859457 | -3.0978391523 | 1.5347583562  |
| S  | -6.1019924643 | -4.677816305  | 1.0110198173  |
| O  | -5.3393556597 | -5.7186769241 | 1.7841091052  |
| O  | -7.5621771379 | -4.6289693623 | 1.3712391434  |

|   |               |               |               |
|---|---------------|---------------|---------------|
| O | -5.8695019157 | -4.7600171777 | -0.4733563089 |
| C | -5.1615523516 | 1.7401660689  | 1.3834782017  |
| C | -5.2063469593 | 3.1805184494  | 0.8934946792  |
| C | -4.468876085  | 4.0378130956  | 1.9167710622  |
| S | -4.6920445894 | 5.8072818426  | 1.6124816262  |
| O | -4.2953897345 | 6.0411027124  | 0.1808890784  |
| O | -3.7881670878 | 6.4919014606  | 2.5999240251  |
| O | -6.150761199  | 6.0832818286  | 1.8609067902  |
| C | -0.8600854451 | -0.3063029585 | -4.0488578896 |
| C | -1.9295981521 | -2.815355905  | -2.6229478532 |
| H | -2.4865604843 | -3.1507152834 | -3.5121137899 |
| H | -2.4348393143 | -3.2187557515 | -1.7307007057 |
| H | -0.9217933887 | -3.2533633138 | -2.6744947296 |
| H | -3.6390547202 | 0.7516148595  | -3.1335890551 |
| H | -4.0248432392 | -0.8574567109 | -3.7282715422 |
| H | -5.6005125165 | -0.7631832421 | -1.9861567568 |
| H | -4.240761988  | -1.4501986784 | -1.0995716628 |
| H | -3.546241259  | 0.7674795027  | -0.2937794513 |
| H | -4.7666155032 | 1.5634808222  | -1.3040196414 |
| H | -7.5312640626 | 0.8653061241  | 0.9203112344  |
| H | -7.2494565528 | -0.2830384241 | -0.3987936903 |
| H | -6.7626520807 | 2.673520351   | -0.9513129239 |
| H | -8.3882552952 | 2.0573750707  | -0.8000940656 |
| H | -7.6619558156 | 2.2108662211  | -3.1329905174 |
| H | -6.3575187025 | 1.0354560579  | -2.8902321358 |
| H | -5.5139117984 | -0.4002624512 | 2.2820535508  |
| H | -4.2072477252 | -0.8249155987 | 1.1727876459  |
| H | -6.0539225756 | -2.0763818491 | -0.235306646  |
| H | -1.4214109926 | -0.4991489383 | -4.977307846  |
| H | -7.1045301051 | -1.8364457931 | 1.168670332   |
| H | -5.5115056968 | -3.0597188274 | 2.6264679582  |
| H | -4.3222452154 | -3.1674777485 | 1.2996631757  |
| H | -5.8321757849 | 1.62434014    | 2.2444717964  |
| H | -4.1445764583 | 1.5021930081  | 1.716658187   |
| H | -4.7179096017 | 3.3036803566  | -0.0822647187 |
| H | -6.2430506362 | 3.5325465749  | 0.8115794903  |

|   |               |               |               |
|---|---------------|---------------|---------------|
| H | 0.1137743404  | -0.8098750537 | -4.1334378897 |
| H | -4.8413214228 | 3.8716339585  | 2.9381780874  |
| H | -3.3874850927 | 3.8407250785  | 1.8980691137  |
| H | -0.686192179  | 0.778557161   | -3.9744577104 |

Geometry optimized cartesian coordinates of SiPc(OX)<sub>2</sub> of compound **2** (neutral).

E=-6981.505364 (radical: -6981.643334) / qh-G(298.15K)=-6980.330872 (wB97X-D/(aug-)cc-pVDZ, water solv.)

|    |               |               |               |
|----|---------------|---------------|---------------|
| Si | -0.5608989914 | -0.3924483435 | 0.5846048614  |
| C  | -1.3371021315 | -6.8918564316 | 0.7967193315  |
| C  | -0.5481127574 | -5.8935432832 | 0.2356372842  |
| C  | -0.8681713048 | -4.5736532385 | 0.5584572811  |
| C  | -1.9295206653 | -4.2673653519 | 1.4159214465  |
| C  | -2.7282043368 | -5.2671043759 | 1.9739183001  |
| C  | -2.4169568569 | -6.5825668278 | 1.6473012614  |
| C  | -0.2936894583 | -3.3045008898 | 0.1518255772  |
| N  | -0.9545653273 | -2.2754693607 | 0.7706281201  |
| C  | -1.9423653667 | -2.8220564028 | 1.5479671534  |
| N  | 0.6741978697  | -3.2155988118 | -0.7396686988 |
| C  | 1.1273374658  | -2.0566738084 | -1.1729527789 |
| N  | -1.896502508  | 0.0200292403  | 1.9121750187  |
| C  | -2.156549226  | 1.2568985901  | 2.4354989624  |
| C  | -3.1790082579 | 1.1511896898  | 3.4604800301  |
| C  | -3.5310198315 | -0.2001384051 | 3.5272179921  |
| C  | -2.7036073821 | -0.8868675443 | 2.5519538516  |
| C  | -3.8027141116 | 2.1071179683  | 4.2660926423  |
| C  | -4.8000920984 | 1.6611438003  | 5.1251248073  |
| C  | -5.1579365063 | 0.2991655401  | 5.1885987795  |
| C  | -4.5249253543 | -0.652433277  | 4.3975934243  |
| N  | -2.7625284272 | -2.1899863128 | 2.3647334005  |
| C  | 2.1162725539  | -1.9510566957 | -2.2304164014 |
| C  | 2.3349822977  | -0.5848018107 | -2.4300141158 |
| C  | 1.4848230137  | 0.1081499351  | -1.4788658454 |
| N  | 0.7752812468  | -0.8016034867 | -0.7439101416 |
| C  | 2.8090609543  | -2.91532625   | -2.9653053135 |
| C  | 3.7338920706  | -2.460173338  | -3.897787642  |

|   |               |               |               |
|---|---------------|---------------|---------------|
| C | 3.9517039206  | -1.0826452668 | -4.1025265801 |
| C | 3.2528089139  | -0.1247377348 | -3.3774720594 |
| N | 1.4821899578  | 1.4229560084  | -1.3587000569 |
| N | -0.1649077415 | 1.4879491574  | 0.4010210083  |
| C | 0.7297721623  | 2.0430237932  | -0.4743017923 |
| C | 0.7589757708  | 3.4876535308  | -0.302389566  |
| C | -0.1619499082 | 3.7802628394  | 0.7058845483  |
| C | -0.7212556065 | 2.5053278514  | 1.129778496   |
| C | 1.497166298   | 4.4891485254  | -0.931086452  |
| C | 1.2698651348  | 5.7983158972  | -0.5147801413 |
| C | 0.3350217176  | 6.0944638915  | 0.4947153018  |
| C | -0.3951247098 | 5.0895169454  | 1.1240384825  |
| N | -1.6284197169 | 2.413479355   | 2.0789823211  |
| H | 2.2323238343  | 4.2543354041  | -1.7015530396 |
| H | -1.1188455556 | -7.9371615824 | 0.5735375953  |
| H | 0.2933547426  | -6.1334971955 | -0.4154329519 |
| H | -3.569330086  | -5.028116384  | 2.6257330121  |
| H | -3.0186015834 | -7.3941562896 | 2.0589687256  |
| H | -3.5198750368 | 3.1586910094  | 4.2162270285  |
| H | -5.3174231869 | 2.3763406107  | 5.7657006399  |
| H | -5.9457127087 | -0.0110608303 | 5.8761560569  |
| H | -4.7944259584 | -1.7077789133 | 4.4459643152  |
| H | 2.6327128544  | -3.9794702848 | -2.8066773953 |
| H | 4.3019974481  | -3.1806710515 | -4.487443636  |
| H | 4.6829190706  | -0.7657232827 | -4.8470839279 |
| H | 3.4148213971  | 0.9416515428  | -3.5351309682 |
| H | 1.8276076447  | 6.6133633477  | -0.9782615366 |
| H | 0.1823370281  | 7.1336804299  | 0.7894758712  |
| H | -1.12655304   | 5.3154472907  | 1.9006709745  |
| O | -1.787300136  | -0.2059162395 | -0.6412984409 |
| C | -1.9650510111 | -1.0190795864 | -1.7765192141 |
| C | -3.3018985229 | -0.7212239325 | -2.4409379499 |
| C | -4.5002095353 | -0.8609281612 | -1.4906022247 |
| C | -4.7196015093 | 0.4415650712  | -0.7348819226 |
| N | -5.9702423241 | 0.5434879598  | 0.1075984509  |
| C | -7.2486110042 | 0.574290009   | -0.7043898903 |

|   |               |               |               |
|---|---------------|---------------|---------------|
| C | -7.3282212602 | 1.5514402724  | -1.880852809  |
| C | -6.8850500811 | 1.0467136094  | -3.2540132922 |
| S | -7.8656310603 | -0.3334201718 | -3.9074494976 |
| O | -9.3021501048 | 0.0980324957  | -3.8078449628 |
| O | -7.3922144408 | -0.511050211  | -5.3218947531 |
| O | -7.5561570753 | -1.5249888232 | -3.0363156362 |
| C | -6.0310838997 | -0.6152875149 | 1.0965357316  |
| C | -6.6556796022 | -1.9326982749 | 0.6487646282  |
| C | -6.2667624175 | -2.9948091794 | 1.6728476132  |
| S | -6.8220471556 | -4.6510413154 | 1.2044482584  |
| O | -6.3573165667 | -5.5421689492 | 2.3228832304  |
| O | -8.3202127252 | -4.5775207631 | 1.0910052856  |
| O | -6.1509282472 | -4.9513091188 | -0.1079756581 |
| C | -5.8304906242 | 1.7680848965  | 1.003210304   |
| C | -5.5306380364 | 3.1220524975  | 0.3641039299  |
| C | -4.8736102682 | 4.0190303832  | 1.4082846421  |
| S | -4.6686932692 | 5.7166694996  | 0.8152003461  |
| O | -3.9108558836 | 5.6115178292  | -0.4798972322 |
| O | -3.8966252256 | 6.4164064122  | 1.8989925797  |
| O | -6.0584782529 | 6.2634125042  | 0.6326159237  |
| H | -1.1561676153 | -0.8593247194 | -2.5127622584 |
| H | -1.9501378189 | -2.0906233256 | -1.50265145   |
| H | -3.2807334853 | 0.2888533702  | -2.8836084683 |
| H | -3.4196232071 | -1.4265462761 | -3.2770321491 |
| H | -5.4009020472 | -1.1290264432 | -2.0613706918 |
| H | -4.2966349409 | -1.6862589177 | -0.7913184967 |
| H | -3.8746863521 | 0.6267884007  | -0.0598676848 |
| H | -4.7578253835 | 1.2734530752  | -1.445620095  |
| H | -8.0366604118 | 0.8011642657  | 0.0241671244  |
| H | -7.4142438659 | -0.4399678788 | -1.0796090035 |
| H | -6.7936208978 | 2.4860431168  | -1.6780958588 |
| H | -8.3874357235 | 1.8346942506  | -1.959638271  |
| H | -7.0085090854 | 1.8499963769  | -3.9925900429 |
| H | -5.8406305306 | 0.712326595   | -3.2984308338 |
| H | -6.5759300095 | -0.2446848125 | 1.9736640259  |
| H | -4.9900425248 | -0.7754973042 | 1.398623789   |



|   |               |               |               |
|---|---------------|---------------|---------------|
| H | -6.3058535263 | -2.2451812851 | -0.3415092287 |
| H | -7.7497004721 | -1.8497103193 | 0.6049547465  |
| H | -6.7055030976 | -2.7963121129 | 2.6610891962  |
| H | -5.1746422973 | -3.0749745059 | 1.7832051207  |
| H | -6.757368603  | 1.8227823717  | 1.587824971   |
| H | -5.0189907959 | 1.507155129   | 1.6944059926  |
| H | -4.8439516909 | 3.039069247   | -0.4871194946 |
| H | -6.4562876725 | 3.594794853   | 0.0106301087  |
| H | -5.4683862811 | 4.0941340725  | 2.3301380365  |
| H | -3.8613797613 | 3.669367177   | 1.6607227723  |
| O | 0.6853499529  | -0.4826058691 | 1.8011588101  |
| C | 0.5742480088  | -1.0743607028 | 3.0733335058  |
| C | 1.9456487307  | -1.1981167896 | 3.7224563314  |
| C | 2.9604453538  | -1.9625275985 | 2.8596423052  |
| C | 3.6374393264  | -1.0100021446 | 1.884764534   |
| N | 4.7943071579  | -1.5587645604 | 1.0818305879  |
| C | 6.0160046726  | -1.87847174   | 1.9181358804  |
| C | 6.5157087301  | -0.8097679261 | 2.8945205598  |
| C | 5.9679167945  | -0.8402913872 | 4.321314162   |
| S | 6.3631748465  | -2.3462387179 | 5.253579167   |
| O | 7.8495540745  | -2.5313570842 | 5.1268393701  |
| O | 5.9145283316  | -2.062290464  | 6.6587276594  |
| O | 5.5823697674  | -3.4634158267 | 4.6080187911  |
| C | 4.3601230771  | -2.8103916598 | 0.3270761458  |
| C | 4.4412120496  | -4.1601827346 | 1.0326960383  |
| C | 3.6244247907  | -5.155129926  | 0.2134306375  |
| S | 3.5032491387  | -6.7766474076 | 1.0051661572  |
| O | 2.6815043658  | -7.6059878048 | 0.0575797368  |
| O | 4.9131521002  | -7.2777939979 | 1.1591373294  |
| O | 2.8210844827  | -6.537201031  | 2.3244139234  |
| C | 5.1050535707  | -0.5641103646 | -0.0297760758 |
| C | 5.3737074766  | 0.8945645351  | 0.3331767012  |
| C | 5.0845153311  | 1.7597317119  | -0.8894985526 |
| S | 5.5719615305  | 3.4841227856  | -0.6368783276 |
| O | 4.8668290878  | 3.9330949061  | 0.6132965147  |
| O | 5.1064780459  | 4.203489844   | -1.8723267989 |

|   |               |               |               |
|---|---------------|---------------|---------------|
| O | 7.0694171725  | 3.4751789411  | -0.4887546406 |
| H | -0.0829816117 | -0.4802860164 | 3.7344268138  |
| H | 0.1360862546  | -2.0875303783 | 3.0022489953  |
| H | 2.3324572567  | -0.1951835553 | 3.9697343211  |
| H | 1.8129408298  | -1.7266060182 | 4.6781897588  |
| H | 3.7084262129  | -2.4478537059 | 3.5029816324  |
| H | 2.4271021524  | -2.7584387546 | 2.3177756114  |
| H | 2.9039552724  | -0.6385671158 | 1.1583086853  |
| H | 4.0241492115  | -0.1432294555 | 2.4305659216  |
| H | 6.800166874   | -2.1144292623 | 1.1882921963  |
| H | 5.7899664077  | -2.7891520704 | 2.4807345354  |
| H | 6.3762189109  | 0.2040072042  | 2.5029683019  |
| H | 7.6042982441  | -0.9495810012 | 2.9559215495  |
| H | 6.4226406772  | -0.0263962521 | 4.9016618331  |
| H | 4.8782210286  | -0.7290974052 | 4.390638422   |
| H | 4.9700660509  | -2.849223642  | -0.5839993917 |
| H | 3.3273074447  | -2.6051790888 | 0.0237815743  |
| H | 4.0414927117  | -4.1227328175 | 2.0522203733  |
| H | 5.4819793656  | -4.5044981273 | 1.0953139331  |
| H | 4.0642885615  | -5.3334964346 | -0.7781128603 |
| H | 2.584710738   | -4.819161273  | 0.0809968748  |
| H | 5.9593462248  | -0.9808151214 | -0.577950583  |
| H | 4.2313136124  | -0.6159427587 | -0.6916755513 |
| H | 4.7346892868  | 1.2454431658  | 1.1527431042  |
| H | 6.4205828186  | 1.0309215111  | 0.6342087456  |
| H | 5.6336118699  | 1.4219263738  | -1.7803745703 |
| H | 4.0087257341  | 1.7874034611  | -1.1186312142 |

Geometry optimized cartesian coordinates of SiPc(OX)<sub>2</sub> of compound **2** (radical).

E=-6981.649613 / qh-G(298.15K)=-6980.479211 (wB97X-D/(aug-)cc-pVDZ, water solv.)

|    |               |               |              |
|----|---------------|---------------|--------------|
| Si | -0.5424972789 | -0.3027615349 | 0.5760374917 |
| C  | -1.2894047691 | -6.8185197995 | 0.81203878   |
| C  | -0.4745443451 | -5.814884637  | 0.2918406162 |
| C  | -0.8192827469 | -4.4959923394 | 0.5815376911 |
| C  | -1.93129969   | -4.1897421154 | 1.3649361597 |
| C  | -2.753818158  | -5.1886381476 | 1.8825528462 |

|   |               |               |               |
|---|---------------|---------------|---------------|
| C | -2.4180836103 | -6.5092823005 | 1.5908996643  |
| C | -0.2251684611 | -3.2203455358 | 0.1824114097  |
| N | -0.9303625029 | -2.1844032267 | 0.7610322357  |
| C | -1.9622502133 | -2.7331783247 | 1.4954057592  |
| N | 0.7612429976  | -3.1467095492 | -0.6633251946 |
| C | 1.1988920268  | -1.9649268684 | -1.1361489599 |
| N | -1.8920263318 | 0.1060138706  | 1.89534077    |
| C | -2.1132734464 | 1.332348142   | 2.4670996911  |
| C | -3.1246062308 | 1.2193187969  | 3.4717111272  |
| C | -3.5232426349 | -0.1330941586 | 3.4841920379  |
| C | -2.7285790489 | -0.7978152676 | 2.5003034226  |
| C | -3.7405388576 | 2.1609685435  | 4.3182224053  |
| C | -4.7535506689 | 1.7180615546  | 5.1475179328  |
| C | -5.1568652925 | 0.3563463073  | 5.1569755247  |
| C | -4.5485195925 | -0.5778437892 | 4.340218271   |
| N | -2.807567729  | -2.1222751843 | 2.2738385195  |
| C | 2.1518837225  | -1.8613559359 | -2.1956024641 |
| C | 2.3158558993  | -0.4844995787 | -2.4514567267 |
| C | 1.4691833431  | 0.2013386559  | -1.5253955478 |
| N | 0.8073503951  | -0.7098632754 | -0.743444856  |
| C | 2.8871175174  | -2.8237296345 | -2.9132636131 |
| C | 3.7809117736  | -2.3731725708 | -3.8661671682 |
| C | 3.9440784951  | -0.9866690246 | -4.1269395723 |
| C | 3.21837959    | -0.0357601551 | -3.4346811024 |
| N | 1.4227751125  | 1.5425522263  | -1.4336379349 |
| N | -0.1556091442 | 1.5739944487  | 0.3915195651  |
| C | 0.6939392105  | 2.1395575834  | -0.5352377044 |
| C | 0.7117548266  | 3.5924707476  | -0.3566710123 |
| C | -0.1332020909 | 3.8720186021  | 0.7152547719  |
| C | -0.6792466255 | 2.5895677177  | 1.1627905407  |
| C | 1.3910984833  | 4.6047576614  | -1.0306142703 |
| C | 1.1934001262  | 5.9124141233  | -0.5901076587 |
| C | 0.3420683215  | 6.1943098052  | 0.4923367123  |
| C | -0.3350827496 | 5.176070502   | 1.1614835812  |
| N | -1.5485554427 | 2.505236771   | 2.1281759436  |
| H | 2.0542739549  | 4.378675762   | -1.8663530042 |

|   |               |               |               |
|---|---------------|---------------|---------------|
| H | -1.0498457649 | -7.8637403494 | 0.6098990378  |
| H | 0.4032736263  | -6.0565190509 | -0.308975796  |
| H | -3.6323188194 | -4.9500085593 | 2.4835796935  |
| H | -3.0400784887 | -7.3192269336 | 1.9754070732  |
| H | -3.4302118034 | 3.2067449976  | 4.3091465025  |
| H | -5.2565037723 | 2.4237831386  | 5.8107564135  |
| H | -5.9612693968 | 0.0471220156  | 5.8265138654  |
| H | -4.8553572309 | -1.6250024799 | 4.3454499535  |
| H | 2.7587063727  | -3.8882734785 | -2.7108281253 |
| H | 4.3734323778  | -3.0920632335 | -4.4345710014 |
| H | 4.657370315   | -0.6719367306 | -4.8905149591 |
| H | 3.3431983968  | 1.0296240135  | -3.6332091757 |
| H | 1.7079633235  | 6.7333312759  | -1.092133964  |
| H | 0.2100971501  | 7.2292690574  | 0.8119594148  |
| H | -1.0011056804 | 5.3884239094  | 1.9985585971  |
| O | -1.7636740787 | -0.1247926369 | -0.6774786203 |
| C | -1.9227808729 | -0.9637828194 | -1.7904601504 |
| C | -3.279565739  | -0.7308307628 | -2.4427436918 |
| C | -4.4587093959 | -0.8946934104 | -1.4727008049 |
| C | -4.6789416276 | 0.3933442242  | -0.6919476319 |
| N | -5.9385129107 | 0.4833900322  | 0.1392122071  |
| C | -7.2083562189 | 0.5428057151  | -0.6831460396 |
| C | -7.2633225752 | 1.5302375558  | -1.852947317  |
| C | -6.8157552824 | 1.0300309084  | -3.2263048487 |
| S | -7.8122305066 | -0.3274200698 | -3.9021920038 |
| O | -9.2430538163 | 0.1250493111  | -3.8092397604 |
| O | -7.3311871665 | -0.4967071067 | -5.3153915292 |
| O | -7.5285487178 | -1.533756394  | -3.0430646833 |
| C | -6.0153509729 | -0.6971299749 | 1.1005202124  |
| C | -6.638862018  | -2.0014898267 | 0.6144838798  |
| C | -6.2511940406 | -3.0871877638 | 1.6137588945  |
| S | -6.8120312591 | -4.7312011682 | 1.1142341279  |
| O | -6.3444446902 | -5.6481265815 | 2.2109968934  |
| O | -8.3112681477 | -4.654216966  | 1.0103002589  |
| O | -6.1496434748 | -5.0076538874 | -0.2082220335 |
| C | -5.7971224654 | 1.6860985534  | 1.0632788826  |

|   |               |               |               |
|---|---------------|---------------|---------------|
| C | -5.5159304743 | 3.0548589251  | 0.4483304855  |
| C | -4.8916784344 | 3.94956437    | 1.5141526382  |
| S | -4.7429236913 | 5.6657594374  | 0.9622171729  |
| O | -3.9548493459 | 5.6222426284  | -0.318626463  |
| O | -4.0219328434 | 6.3727190342  | 2.0764480126  |
| O | -6.1490571579 | 6.1643301242  | 0.7624839469  |
| H | -1.1274464814 | -0.7903397832 | -2.5404322005 |
| H | -1.8637740139 | -2.0300053839 | -1.5008682206 |
| H | -3.3058420269 | 0.2713868016  | -2.9041596552 |
| H | -3.3859673022 | -1.4560036369 | -3.2638818258 |
| H | -5.3654306013 | -1.1633320587 | -2.0338824463 |
| H | -4.2362996086 | -1.7271980057 | -0.7865421546 |
| H | -3.8402073403 | 0.5589044055  | -0.0049278987 |
| H | -4.7060602764 | 1.2405025643  | -1.385195147  |
| H | -7.9998051813 | 0.7758705021  | 0.0399937477  |
| H | -7.3881061811 | -0.4649546497 | -1.0687955627 |
| H | -6.7151031845 | 2.4543489345  | -1.6394416064 |
| H | -8.3172234603 | 1.8310370262  | -1.9385007581 |
| H | -6.9188750526 | 1.8415813195  | -3.9590164212 |
| H | -5.7766359589 | 0.6787023133  | -3.2628375048 |
| H | -6.5705753373 | -0.3442531152 | 1.9784805126  |
| H | -4.9795627384 | -0.8677188599 | 1.4142639373  |
| H | -6.2826349171 | -2.2889409526 | -0.3809899858 |
| H | -7.7329032977 | -1.9189026537 | 0.5660241928  |
| H | -6.6860094459 | -2.9081751275 | 2.6075869543  |
| H | -5.1585581316 | -3.1658947701 | 1.719380853   |
| H | -6.7205729171 | 1.7229352709  | 1.6549145201  |
| H | -4.9774568392 | 1.4158249196  | 1.7415647849  |
| H | -4.816284302  | 2.9960445777  | -0.394602314  |
| H | -6.4463686681 | 3.5140832928  | 0.0892471294  |
| H | -5.4914988921 | 3.9837883621  | 2.4351812926  |
| H | -3.8700380937 | 3.6267736934  | 1.764037271   |
| O | 0.6981109744  | -0.3867369668 | 1.8202574541  |
| C | 0.5585686494  | -0.9967863456 | 3.07577121    |
| C | 1.9222237872  | -1.1966081717 | 3.7247472845  |
| C | 2.9045070584  | -1.9874614452 | 2.8484661747  |

|   |               |               |               |
|---|---------------|---------------|---------------|
| C | 3.5816134628  | -1.0593188613 | 1.8498699934  |
| N | 4.7426425482  | -1.6271041583 | 1.0655867958  |
| C | 5.964880901   | -1.9174795919 | 1.9106334495  |
| C | 6.4474138894  | -0.8308585679 | 2.8764934196  |
| C | 5.8928458779  | -0.8494058444 | 4.3008364033  |
| S | 6.3029732648  | -2.3363607089 | 5.2564426523  |
| O | 7.7919469745  | -2.5067272316 | 5.1357836945  |
| O | 5.848861017   | -2.036232174  | 6.6567628718  |
| O | 5.5364434333  | -3.4725334692 | 4.6276674249  |
| C | 4.3135716364  | -2.900352638  | 0.3456051602  |
| C | 4.3943901015  | -4.2288498439 | 1.0905615683  |
| C | 3.5738279556  | -5.2417382189 | 0.2979307177  |
| S | 3.4644566651  | -6.8490180146 | 1.1173435673  |
| O | 2.6323647248  | -7.6966601404 | 0.1946229288  |
| O | 4.8767123092  | -7.3480418203 | 1.2620517444  |
| O | 2.7989806423  | -6.5910572463 | 2.441979597   |
| C | 5.0482720783  | -0.6609844605 | -0.0717782508 |
| C | 5.3499022551  | 0.7971952895  | 0.2650870025  |
| C | 5.0852933975  | 1.648479501   | -0.9724440827 |
| S | 5.6423829945  | 3.3559799808  | -0.7575715399 |
| O | 4.9509538176  | 3.8650450761  | 0.4778641405  |
| O | 5.2130092599  | 4.0670048631  | -2.0110514581 |
| O | 7.1380750523  | 3.29149216    | -0.6013318086 |
| H | -0.0756774161 | -0.3887350247 | 3.7488980048  |
| H | 0.0754131147  | -1.988322179  | 2.9885437374  |
| H | 2.3568209101  | -0.2178074691 | 3.9914179957  |
| H | 1.7676228359  | -1.7381584662 | 4.670414515   |
| H | 3.6543659654  | -2.4799443728 | 3.4843936752  |
| H | 2.3473749892  | -2.7784409396 | 2.3218761532  |
| H | 2.8490502224  | -0.7098063069 | 1.1122757944  |
| H | 3.9652582207  | -0.1772879064 | 2.3731712122  |
| H | 6.7558168034  | -2.1528598579 | 1.1876852786  |
| H | 5.7500559993  | -2.8236393749 | 2.4845086037  |
| H | 6.2974224221  | 0.1765487256  | 2.473081091   |
| H | 7.5373429159  | -0.9569115969 | 2.9448709624  |
| H | 6.3338352952  | -0.0217712517 | 4.8723799423  |

|   |              |               |               |
|---|--------------|---------------|---------------|
| H | 4.8013989868 | -0.7519364161 | 4.3622950765  |
| H | 4.9282812871 | -2.9641727298 | -0.5608600462 |
| H | 3.2824754625 | -2.7067747468 | 0.0297342077  |
| H | 3.9928858296 | -4.1620629896 | 2.1078259936  |
| H | 5.4342647984 | -4.5741970452 | 1.16464206    |
| H | 4.0051006608 | -5.4367594316 | -0.6944321205 |
| H | 2.5345374824 | -4.9041646533 | 0.1670979941  |
| H | 5.8886859181 | -1.1002864745 | -0.623926572  |
| H | 4.1626991616 | -0.7100607386 | -0.7185629851 |
| H | 4.7163216937 | 1.1759055509  | 1.0766574864  |
| H | 6.3990095089 | 0.9135073324  | 0.567379669   |
| H | 5.6142917889 | 1.2719968346  | -1.8599564561 |
| H | 4.0100012502 | 1.7113308596  | -1.1964255037 |

Geometry optimized cartesian coordinates of SiPc(OH)(OX) of compound **1** (neutral).

E=-4874.840062 (radical: -4874.974716) / qh-G(298.15K)=-4874.015567 (wB97X-D/(aug-)cc-pVDZ, water solv.)

|    |               |               |               |
|----|---------------|---------------|---------------|
| Si | 2.2995755843  | 0.5324052686  | 0.859015759   |
| C  | 4.2803898551  | -5.6881216832 | 0.7373868035  |
| C  | 4.6810876694  | -4.3984021705 | 0.4039315637  |
| C  | 3.8275237604  | -3.3535321832 | 0.7595715577  |
| C  | 2.6230594324  | -3.591605967  | 1.4272808178  |
| C  | 2.2122502077  | -4.8839144333 | 1.7566227598  |
| C  | 3.0606538944  | -5.927463539  | 1.3996574222  |
| C  | 3.8924774229  | -1.9192912779 | 0.5301089388  |
| N  | 2.7804392618  | -1.3183396113 | 1.046505419   |
| C  | 2.0063688719  | -2.2918049387 | 1.6305598053  |
| N  | 4.8837930746  | -1.353405483  | -0.1353877406 |
| C  | 4.8646888655  | -0.0799900652 | -0.4711014952 |
| N  | 0.7414795079  | 0.2499020467  | 1.9734452269  |
| C  | -0.1096356993 | 1.218932594   | 2.4299553242  |
| C  | -1.0561682487 | 0.6372694127  | 3.3634865003  |
| C  | -0.7524283566 | -0.7269256558 | 3.4316782312  |
| C  | 0.3774810545  | -0.9366287481 | 2.5466634165  |
| C  | -2.1225582839 | 1.18178393    | 4.0848343679  |

|   |               |               |               |
|---|---------------|---------------|---------------|
| C | -2.8783858862 | 0.3111935452  | 4.8601790898  |
| C | -2.57317325   | -1.063996063  | 4.9267949142  |
| C | -1.5041691337 | -1.6016157758 | 4.2202264876  |
| N | 0.9138039498  | -2.1275110751 | 2.3423795512  |
| C | 5.9221640565  | 0.5413661296  | -1.2548815304 |
| C | 5.5323965479  | 1.8674911318  | -1.4593337284 |
| C | 4.2530793783  | 2.0269116821  | -0.7845058406 |
| N | 3.8840842651  | 0.8403343508  | -0.2100411842 |
| C | 7.1144416124  | 0.0436334978  | -1.7802556389 |
| C | 7.9022110069  | 0.9239438898  | -2.5159573289 |
| C | 7.5091713552  | 2.2597469749  | -2.7221255778 |
| C | 6.3181170517  | 2.7523275294  | -2.1971608708 |
| N | 3.5995165568  | 3.1697062366  | -0.7630054731 |
| N | 1.8271945996  | 2.4021853243  | 0.6867269493  |
| C | 2.4746965255  | 3.3252752907  | -0.0883201846 |
| C | 1.7615815404  | 4.5907081864  | -0.0447021577 |
| C | 0.6640802057  | 4.3973437678  | 0.7996889133  |
| C | 0.7300276469  | 3.0155834705  | 1.2450419479  |
| C | 2.0073613187  | 5.8235426619  | -0.6508419035 |
| C | 1.1130380673  | 6.8541680737  | -0.3813632252 |
| C | 0.0073818862  | 6.6583660903  | 0.4684563999  |
| C | -0.2354703751 | 5.4289883373  | 1.0723912089  |
| N | -0.1473885242 | 2.4914678987  | 2.0727673938  |
| H | 2.8651329972  | 5.9675640419  | -1.308197663  |
| H | 4.9172375573  | -6.5341220982 | 0.4750071974  |
| H | 5.6183622154  | -4.2085074127 | -0.1195393706 |
| H | 1.2558753501  | -5.0695485203 | 2.2481679723  |
| H | 2.7751970332  | -6.9546371279 | 1.6315790368  |
| H | -2.3531396773 | 2.2462189736  | 4.0325439078  |
| H | -3.7235564972 | 0.6958902274  | 5.4323576656  |
| H | -3.1888568251 | -1.7148650419 | 5.5488808684  |
| H | -1.2596275627 | -2.6627732888 | 4.2737746451  |
| H | 7.4128009157  | -0.9925963708 | -1.6197132652 |
| H | 8.8429242347  | 0.5748383987  | -2.944027341  |
| H | 8.1528624404  | 2.9187358303  | -3.3064657465 |
| H | 6.0075602117  | 3.7853153715  | -2.3554754713 |



|    |               |               |               |
|----|---------------|---------------|---------------|
| H  | 1.2671925614  | 7.8337435554  | -0.8361454808 |
| H  | -0.6756319469 | 7.4889338124  | 0.6527846854  |
| H  | -1.1015521613 | 5.2828763166  | 1.7188510601  |
| O  | 3.2362152574  | 0.8357414228  | 2.3042376403  |
| O  | 1.3387821545  | 0.1836653659  | -0.5365577288 |
| Si | 1.4342203542  | -0.4044087216 | -2.1127623141 |
| C  | -0.3239823752 | -0.4130721402 | -2.8011981112 |
| C  | -1.3629242999 | -1.0437017626 | -1.8559911849 |
| C  | -2.0218931498 | 0.0564908384  | -1.0412722101 |
| N  | -3.1913419833 | -0.3550563272 | -0.1786055709 |
| C  | -4.3952031973 | -0.8121229784 | -0.9780176074 |
| C  | -4.8764323574 | 0.0805371425  | -2.1263210348 |
| C  | -4.2945516493 | -0.1679576497 | -3.5180304642 |
| S  | -4.6818551054 | -1.7941594328 | -4.2235824334 |
| O  | -6.1767526223 | -1.932320347  | -4.1472302555 |
| O  | -4.158953665  | -1.7406465506 | -5.6308947713 |
| O  | -3.9618601456 | -2.8097296799 | -3.372747589  |
| C  | -2.7617632864 | -1.4642636734 | 0.7779421571  |
| C  | -2.8534429303 | -2.914255499  | 0.3137774974  |
| C  | -2.1015247884 | -3.7696640298 | 1.3296684433  |
| S  | -1.9174106726 | -5.4872625433 | 0.7964584379  |
| O  | -1.1892747898 | -6.1633573374 | 1.9258562461  |
| O  | -3.309242803  | -6.0179298801 | 0.5870295305  |
| O  | -1.1148766374 | -5.4362728231 | -0.4749454869 |
| C  | -3.5279505951 | 0.8040891266  | 0.7480090259  |
| C  | -3.8271355205 | 2.1757303     | 0.1524930223  |
| C  | -3.6198854723 | 3.2199980846  | 1.2445661133  |
| S  | -4.1298503314 | 4.8731099492  | 0.7128626636  |
| O  | -3.4118553427 | 5.1340466766  | -0.5818641932 |
| O  | -3.6976077872 | 5.7862777856  | 1.827023068   |
| O  | -5.6239079729 | 4.8115639263  | 0.546916201   |
| C  | 2.5034454124  | 0.666966946   | -3.22776969   |
| C  | 2.0469325554  | -2.1846119035 | -2.1455547977 |
| H  | 1.8401697143  | -2.6147979299 | -3.1382560072 |
| H  | 1.5333430786  | -2.8055010559 | -1.3939980917 |
| H  | 3.1307952688  | -2.2562778556 | -1.9746726976 |

|   |               |               |               |
|---|---------------|---------------|---------------|
| H | -0.6266317028 | 0.6067836841  | -3.0949173583 |
| H | -0.2781858409 | -0.9910222169 | -3.7387802187 |
| H | -2.1183744876 | -1.6064005605 | -2.4227637912 |
| H | -0.869894783  | -1.7633579851 | -1.1850784137 |
| H | -1.2846177425 | 0.5168268052  | -0.367117512  |
| H | -2.3920270373 | 0.8399825598  | -1.710815009  |
| H | -5.1944355202 | -0.9277086173 | -0.2355754449 |
| H | -4.1589490957 | -1.8015451735 | -1.3802174371 |
| H | -4.754550273  | 1.1451212199  | -1.8999237763 |
| H | -5.9625110037 | -0.0787631632 | -2.1886548645 |
| H | -4.72985687   | 0.5508860342  | -4.2250307729 |
| H | -3.2026993349 | -0.0716643881 | -3.5770899403 |
| H | -3.367942534  | -1.3446060403 | 1.6848613489  |
| H | -1.72533116   | -1.2163139499 | 1.0362298803  |
| H | -2.410117591  | -3.0615527671 | -0.6776588511 |
| H | 2.2793457181  | 0.4239949639  | -4.2787039674 |
| H | -3.8995312855 | -3.2435990064 | 0.2648342964  |
| H | -2.6167224742 | -3.8060372026 | 2.2997798422  |
| H | -1.0729893905 | -3.4128795457 | 1.4902391386  |
| H | -4.374184143  | 0.4665377911  | 1.3594540285  |
| H | -2.6550411186 | 0.8847443476  | 1.4062827492  |
| H | -3.1605942153 | 2.4223665441  | -0.6834944876 |
| H | -4.8632971251 | 2.2285554859  | -0.2056451123 |
| H | 3.57941696    | 0.495935514   | -3.0718615053 |
| H | -4.2137022715 | 3.0045961681  | 2.1446996618  |
| H | -2.5591561508 | 3.2988128983  | 1.5265843589  |
| H | 2.2905140178  | 1.7363872931  | -3.073849029  |
| H | 3.3173630175  | 1.766481545   | 2.5239667893  |

Geometry optimized cartesian coordinates of SiPc(OH)(OX) of compound **1** (radical).

E=-4874.981124 / qh-G(298.15K)=-4874.159798 (wB97X-D/(aug-)cc-pVDZ, water solv.)

|    |               |               |              |
|----|---------------|---------------|--------------|
| Si | -0.9007689849 | -0.3105365437 | 0.8259659951 |
| C  | -1.0670831587 | -6.8487241053 | 1.0987267912 |
| C  | -0.2779512042 | -5.7793758646 | 0.6791860797 |
| C  | -0.7329614788 | -4.4942890195 | 0.9671738945 |
| C  | -1.9284945441 | -4.2846517237 | 1.6509556445 |

C -2.727099437 -5.3475369081 2.0681898233  
C -2.2780929402 -6.6352552526 1.7801547927  
C -0.201697329 -3.1707627799 0.6340847871  
N -1.0488616091 -2.2018607035 1.1183232127  
C -2.0887984268 -2.8364653028 1.778025242  
N 0.8867384025 -3.0211607429 -0.0692043446  
C 1.2884977321 -1.8119876663 -0.4932662379  
N -2.4410412498 -0.0001592105 1.9655696  
C -2.9129246774 1.221097129 2.3732050825  
C -3.9515536265 1.0379949117 3.3342723076  
C -4.1081939146 -0.3571099221 3.489881748  
C -3.1559850888 -0.9666381428 2.6214370871  
C -4.7816713545 1.9385705241 4.0329427549  
C -5.7570884786 1.4137860479 4.8578014187  
C -5.9147590935 0.0093430068 5.0133923095  
C -5.098104167 -0.8815597153 4.3446338823  
N -3.0431526103 -2.3035874806 2.4763542707  
C 2.4487023557 -1.621143492 -1.3153046548  
C 2.5156900609 -0.2424456242 -1.5930784836  
C 1.3974903037 0.3591065981 -0.9266547642  
N 0.6744216275 -0.6053122881 -0.2754031063  
C 3.4042580262 -2.5102041901 -1.8356140824  
C 4.4117606344 -1.9846348384 -2.6265785423  
C 4.4792257785 -0.5968852329 -2.9055944079  
C 3.5401698723 0.2842982592 -2.3969345989  
N 1.1461741869 1.6767654562 -0.9729999332  
N -0.7282365422 1.5979861275 0.5491043027  
C 0.1695382442 2.2128591451 -0.2947733776  
C -0.0882645001 3.6535224406 -0.3153404757  
C -1.1559148346 3.8832050019 0.5509501901  
C -1.5523391653 2.5781281281 1.082574587  
C 0.5340985133 4.6973563743 -0.997321758  
C 0.0485861808 5.9853882249 -0.7814115404  
C -1.0263049833 6.2173464622 0.0939109024  
C -1.6443982368 5.1694341878 0.7737108138  
N -2.5282711733 2.435734518 1.9264870096

|    |               |               |               |
|----|---------------|---------------|---------------|
| H  | 1.368680537   | 4.5087342061  | -1.6736477988 |
| H  | -0.7457513614 | -7.8704465714 | 0.8897800145  |
| H  | 0.6567549189  | -5.938484239  | 0.1402332092  |
| H  | -3.675005717  | -5.1761181869 | 2.5810316328  |
| H  | -2.8774330774 | -7.495006025  | 2.0844172742  |
| H  | -4.6584588788 | 3.0163272859  | 3.9144396629  |
| H  | -6.4200491441 | 2.0850139254  | 5.4066016866  |
| H  | -6.6951936225 | -0.3654804658 | 5.6779383556  |
| H  | -5.2141104382 | -1.9596060681 | 4.4661302243  |
| H  | 3.348579165   | -3.5785716942 | -1.6216856249 |
| H  | 5.1704347637  | -2.6473284768 | -3.0468448649 |
| H  | 5.2882398332  | -0.2214326835 | -3.5348134853 |
| H  | 3.5883390076  | 1.3529551972  | -2.6114376082 |
| H  | 0.5082420217  | 6.8293974958  | -1.2982393533 |
| H  | -1.384662722  | 7.2375419686  | 0.241273676   |
| H  | -2.4834362917 | 5.3555129389  | 1.4454828108  |
| O  | 0.1354546576  | -0.2426242041 | 2.2526031397  |
| O  | -1.9635325722 | -0.3893086041 | -0.5574055089 |
| Si | -2.0875086179 | -1.0788809157 | -2.0799134968 |
| C  | -3.7550168974 | -0.5282231839 | -2.7852243082 |
| C  | -4.9181641389 | -0.6849850559 | -1.7899426327 |
| C  | -5.1106961893 | 0.6209606193  | -1.0369089322 |
| N  | -6.3080745154 | 0.6849734434  | -0.1183633555 |
| C  | -7.6311050918 | 0.6304459276  | -0.854347239  |
| C  | -7.8252927542 | 1.5623934154  | -2.0560415444 |
| C  | -7.4427909599 | 1.0368831385  | -3.4397407618 |
| S  | -8.4178476126 | -0.382315475  | -4.0110747538 |
| O  | -9.8583298543 | 0.0315616722  | -3.8921899189 |
| O  | -7.9786307545 | -0.6080971352 | -5.4301739046 |
| O  | -8.0692250987 | -1.5343769427 | -3.1031498837 |
| C  | -6.2293109295 | -0.4542706328 | 0.8969219455  |
| C  | -6.8621874738 | -1.7952453718 | 0.5414514616  |
| C  | -6.4244483203 | -2.8065301194 | 1.5972643234  |
| S  | -6.8944240601 | -4.4991415654 | 1.1737303152  |
| O  | -6.4556713074 | -5.3296239953 | 2.3491937931  |
| O  | -8.387078171  | -4.4915378223 | 0.9812799241  |

|   |               |               |               |
|---|---------------|---------------|---------------|
| O | -6.1465092956 | -4.8295618456 | -0.0898176809 |
| C | -6.1852332574 | 1.9337086344  | 0.7399164411  |
| C | -6.0824637249 | 3.2972529703  | 0.0675547689  |
| C | -5.5237238874 | 4.278355641   | 1.0930350491  |
| S | -5.5630063403 | 5.9861213525  | 0.4985300253  |
| O | -4.8787347402 | 5.9796996489  | -0.8405345268 |
| O | -4.8213338518 | 6.7775798266  | 1.5406326472  |
| O | -7.018326505  | 6.3582314387  | 0.4036730563  |
| C | -0.7387415027 | -0.5292685552 | -3.2704754897 |
| C | -2.1303553005 | -2.9613003836 | -1.993328103  |
| H | -2.4761621515 | -3.3638181876 | -2.9587556759 |
| H | -2.8204315261 | -3.3127315328 | -1.2092332027 |
| H | -1.1356165279 | -3.3840876041 | -1.7904773951 |
| H | -3.6957525061 | 0.5086266316  | -3.1594441529 |
| H | -3.939677868  | -1.1560204604 | -3.6724433895 |
| H | -5.8456198021 | -0.9720624061 | -2.3057262987 |
| H | -4.6901009718 | -1.4942852484 | -1.0799930308 |
| H | -4.228418227  | 0.8252842959  | -0.4125106321 |
| H | -5.2170948274 | 1.4482386202  | -1.7472473714 |
| H | -8.3863545062 | 0.847561909   | -0.0886385624 |
| H | -7.7739998757 | -0.4011055646 | -1.1885031445 |
| H | -7.3207111995 | 2.5243781274  | -1.9182388975 |
| H | -8.8987504209 | 1.7995912616  | -2.0770800981 |
| H | -7.6311079771 | 1.8189836887  | -4.1874806529 |
| H | -6.3921558901 | 0.7334159878  | -3.5339665249 |
| H | -6.6871033274 | -0.0807631732 | 1.8214910329  |
| H | -5.1571126131 | -0.5781977339 | 1.0915638273  |
| H | -6.551468025  | -2.1494846854 | -0.4483417633 |
| H | -1.0464063821 | -0.77049267   | -4.3007779599 |
| H | -7.9577090668 | -1.7243608105 | 0.5417557401  |
| H | -6.8797018106 | -2.5995422077 | 2.5758231646  |
| H | -5.3307168715 | -2.834258057  | 1.7198395439  |
| H | -7.0481140613 | 1.9184359759  | 1.4179161843  |
| H | -5.2843800123 | 1.7614984552  | 1.3408545446  |
| H | -5.4091398491 | 3.2850683618  | -0.7992450687 |
| H | -7.0691385256 | 3.6455403848  | -0.2647214075 |

|   |               |               |               |
|---|---------------|---------------|---------------|
| H | 0.2189487886  | -1.0358323783 | -3.0772369006 |
| H | -6.1091167397 | 4.2804666097  | 2.0241242805  |
| H | -4.4748879793 | 4.0486734432  | 1.3335531641  |
| H | -0.5761129886 | 0.5581320003  | -3.2070789343 |
| H | 0.4907307047  | 0.6378306454  | 2.3912886982  |

Geometry optimized cartesian coordinates of SiPc(OH)(OX) of compound **2** (neutral).

E=-4544.758755 (radical: -4544.893683) / qh-G(298.15K)=-4543.975110 (wB97X-D/(aug-)cc-pVDZ, water solv.)

|    |               |               |               |
|----|---------------|---------------|---------------|
| Si | 2.2090234469  | 0.6272357366  | 0.8935552585  |
| C  | 3.9094006053  | -5.670097009  | 0.5128690794  |
| C  | 4.3139701472  | -4.3950545917 | 0.1342809032  |
| C  | 3.5371086554  | -3.3214628267 | 0.5746032465  |
| C  | 2.4019415288  | -3.5196302375 | 1.3662231048  |
| C  | 1.9889919134  | -4.7989755159 | 1.7437905369  |
| C  | 2.75988597    | -5.8692039289 | 1.3035422852  |
| C  | 3.6357252663  | -1.8897099305 | 0.3514137981  |
| N  | 2.6102964055  | -1.2500149091 | 0.9903190705  |
| C  | 1.8513392754  | -2.2026451994 | 1.627216091   |
| N  | 4.5825900823  | -1.3531151852 | -0.4005081017 |
| C  | 4.6064898097  | -0.0701423374 | -0.688568446  |
| N  | 0.6936802991  | 0.3771187732  | 2.0756141026  |
| C  | -0.131093443  | 1.3549525288  | 2.5580868469  |
| C  | -1.0956516802 | 0.776758646   | 3.4750228798  |
| C  | -0.8219013745 | -0.5943100152 | 3.5182512431  |
| C  | 0.3025126752  | -0.8131365507 | 2.628560771   |
| C  | -2.1546678151 | 1.3306280762  | 4.2003567371  |
| C  | -2.9327049561 | 0.4614466669  | 4.9549206411  |
| C  | -2.6578874122 | -0.9212477744 | 4.9960210189  |
| C  | -1.5974606644 | -1.4684176714 | 4.2843203537  |
| N  | 0.8021722165  | -2.0125633498 | 2.3972951659  |
| C  | 5.6150656044  | 0.5226483834  | -1.5555680102 |
| C  | 5.284204732   | 1.8745362875  | -1.6751977811 |
| C  | 4.0880814887  | 2.076445806   | -0.8699753908 |
| N  | 3.7153009078  | 0.8935649393  | -0.29283652   |
| C  | 6.7208525468  | -0.0172381354 | -2.2115321635 |

C 7.4840152679 0.8482636756 -2.9897245975  
C 7.1507509536 2.2104346767 -3.1101299849  
C 6.0453871308 2.7449300011 -2.4548843499  
N 3.503644642 3.2510078388 -0.7521809261  
N 1.7971164617 2.5170736264 0.7929378776  
C 2.442094235 3.437026633 0.0110095813  
C 1.7887826485 4.729933717 0.1305621882  
C 0.7179101441 4.5507797546 1.0103713055  
C 0.7464482377 3.1547583908 1.4104092905  
C 2.0542503425 5.9709264508 -0.4503988224  
C 1.2067644846 7.0224752627 -0.1175730304  
C 0.1246086348 6.83900967 0.7651360293  
C -0.1381196212 5.6011899736 1.3427039343  
N -0.130952427 2.6381283755 2.2413484114  
H 2.8903950683 6.1056986738 -1.1368528911  
H 4.4873707781 -6.5366530792 0.1886171544  
H 5.1975524544 -4.2357371625 -0.4841380568  
H 1.0886785598 -4.9553962644 2.3395294423  
H 2.4689470822 -6.886129482 1.5710349629  
H -2.3627776067 2.4003409078 4.1672574447  
H -3.773009147 0.8528657092 5.5297476625  
H -3.2916836753 -1.5704143589 5.6015355479  
H -1.3784100631 -2.5361008045 4.3148207548  
H 6.9738713717 -1.0733719639 -2.116249239  
H 8.3581152079 0.4665005896 -3.5191197465  
H 7.7729894184 2.8567362077 -3.7307219653  
H 5.7816042745 3.7988342624 -2.5457272881  
H 1.3782298694 8.0093260518 -0.5498657433  
H -0.5228897595 7.6864823442 0.9950617521  
H -0.9886923098 5.4548984677 2.0095566932  
O 3.2461242433 0.8482489983 2.2758887899  
O 1.1254569671 0.383907588 -0.4529879984  
C 1.3850459189 -0.3547821092 -1.6214554183  
C 0.1076080158 -0.5226912467 -2.4324639374  
C -1.0430193825 -1.1370878957 -1.6214990895  
C -1.813830369 -0.0391708986 -0.9028760437

|   |               |               |               |
|---|---------------|---------------|---------------|
| N | -3.0778059973 | -0.4498258299 | -0.1843133992 |
| C | -4.1906414559 | -0.8836635001 | -1.116092537  |
| C | -4.5216823918 | 0.020090862   | -2.3076927389 |
| C | -3.7867008776 | -0.2413725228 | -3.6227172669 |
| S | -4.10409527   | -1.8682385487 | -4.3609430863 |
| O | -5.5989801254 | -1.99101029   | -4.4599062371 |
| O | -3.4184034917 | -1.8288422646 | -5.696965694  |
| O | -3.4986048944 | -2.8853080923 | -3.426378721  |
| C | -2.7755172984 | -1.5746528674 | 0.7997180914  |
| C | -2.8102635842 | -3.0153972576 | 0.2995927475  |
| C | -2.123143163  | -3.882688629  | 1.3495960258  |
| S | -2.0069118641 | -5.6177275807 | 0.8531641642  |
| O | -1.3048013512 | -6.2978387615 | 1.9962124327  |
| O | -3.419865205  | -6.0956367749 | 0.6589200714  |
| O | -1.2067685038 | -5.6283665663 | -0.4205537431 |
| C | -3.5007399989 | 0.7038276518  | 0.7150635059  |
| C | -3.6934354485 | 2.0892382122  | 0.1056804428  |
| C | -3.5915558773 | 3.1225610716  | 1.2235615301  |
| S | -4.0528303772 | 4.7805071263  | 0.6628308035  |
| O | -3.1996033639 | 5.0647977893  | -0.5419649427 |
| O | -3.7549166588 | 5.681465046   | 1.8291664948  |
| O | -5.5190398213 | 4.711110062   | 0.3316778451  |
| H | 2.1489883626  | 0.1405222069  | -2.2484016489 |
| H | 1.7676657584  | -1.3633221038 | -1.3750190971 |
| H | -0.1981081477 | 0.4499501973  | -2.8535225703 |
| H | 0.3392907329  | -1.1749501169 | -3.2875250709 |
| H | -1.7108602772 | -1.7061722989 | -2.2839724831 |
| H | -0.6168144025 | -1.8476757238 | -0.897044626  |
| H | -1.1681531875 | 0.4333232752  | -0.1520137795 |
| H | -2.1042911898 | 0.7355979067  | -1.619767876  |
| H | -5.0710372856 | -0.9910940571 | -0.4702499098 |
| H | -3.9239279749 | -1.8746094794 | -1.4946858006 |
| H | -4.405146064  | 1.0821260773  | -2.0649306935 |
| H | -5.5960716833 | -0.1177007436 | -2.4958229261 |
| H | -4.1289583328 | 0.4777211222  | -4.3788894895 |
| H | -2.6945408792 | -0.1571257916 | -3.5550371816 |



|   |               |               |               |
|---|---------------|---------------|---------------|
| H | -3.4941074203 | -1.4674827933 | 1.6218188708  |
| H | -1.7820639411 | -1.334784841  | 1.1963723165  |
| H | -2.2948366336 | -3.1380120879 | -0.6595610358 |
| H | -3.8461932406 | -3.3544546916 | 0.1657829894  |
| H | -2.6644119067 | -3.8781768426 | 2.3065753398  |
| H | -1.0861335704 | -3.5617342681 | 1.5313073928  |
| H | -4.4243717166 | 0.3784443448  | 1.2099637506  |
| H | -2.7161523401 | 0.7531489937  | 1.480337507   |
| H | -2.9289796904 | 2.324647922   | -0.6452759732 |
| H | -4.6790128208 | 2.1685647334  | -0.3712709997 |
| H | -4.2669169601 | 2.8973733967  | 2.0617355578  |
| H | -2.5620166798 | 3.2047883969  | 1.603756771   |
| H | 3.3749505764  | 1.7678527372  | 2.5187267053  |

Geometry optimized cartesian coordinates of SiPc(OH)(OX) of compound **2** (radical).

E=-4544.900094 / qh-G(298.15K)=-4544.118775 (wB97X-D/(aug-)cc-pVDZ, water solv.)

|    |               |               |               |
|----|---------------|---------------|---------------|
| Si | 2.1836765564  | 0.681416337   | 0.8779435554  |
| C  | 3.8641924534  | -5.6436219136 | 0.5980947064  |
| C  | 4.2870732758  | -4.3674720805 | 0.2324971449  |
| C  | 3.4952617092  | -3.2905392962 | 0.6276762185  |
| C  | 2.3258361165  | -3.4790675414 | 1.3620391846  |
| C  | 1.8945722366  | -4.7531175144 | 1.7284396338  |
| C  | 2.680843813   | -5.833469746  | 1.3331629943  |
| C  | 3.615679883   | -1.8510491628 | 0.3894586834  |
| N  | 2.5612623242  | -1.1978117954 | 0.9867223418  |
| C  | 1.7628355299  | -2.1508022114 | 1.6012607828  |
| N  | 4.577192107   | -1.3495655611 | -0.3365929015 |
| C  | 4.6072389535  | -0.0469268059 | -0.6620850117 |
| N  | 0.6508977134  | 0.4551291083  | 2.0478470296  |
| C  | -0.1363487671 | 1.4521528373  | 2.5597335339  |
| C  | -1.0979469171 | 0.8969252922  | 3.4562568119  |
| C  | -0.8764542178 | -0.4975620313 | 3.4617476182  |
| C  | 0.2181283385  | -0.7338940915 | 2.5792053042  |
| C  | -2.1445411748 | 1.4646062287  | 4.2112675791  |
| C  | -2.9532555578 | 0.613340507   | 4.9382712067  |
| C  | -2.7346986805 | -0.7915107427 | 4.937658206   |

C -1.7026892544 -1.3565147953 4.2144317963  
N 0.7036806482 -1.9663199068 2.327427731  
C 5.599207261 0.5148998926 -1.5333825284  
C 5.257819028 1.8708204043 -1.7012114417  
C 4.0773117433 2.0904163845 -0.9168020819  
N 3.7092269592 0.9220166196 -0.3003583948  
C 6.7201500044 -0.0340784848 -2.1783207841  
C 7.4778173874 0.8024103706 -2.9801829704  
C 7.1355396525 2.1673161562 -3.1481386609  
C 6.0318020492 2.7143799078 -2.5165133979  
N 3.4782344301 3.2889536038 -0.8192691802  
N 1.8054166643 2.5761909476 0.7736924128  
C 2.4495026241 3.4831019138 -0.0433721856  
C 1.8089079952 4.7937344385 0.0833871977  
C 0.7652522817 4.6430385321 0.9941663383  
C 0.7721784796 3.2415388895 1.4128388312  
C 2.0735701376 6.0221000823 -0.5198849153  
C 1.2524101977 7.0949687844 -0.1784566578  
C 0.1960899863 6.9398041217 0.7363705665  
C -0.0644874892 5.7090917947 1.3359010074  
N -0.0997781268 2.7637846495 2.2475126822  
H 2.8907059248 6.1350392877 -1.2333774266  
H 4.4562735474 -6.5124899622 0.3061472938  
H 5.1998310876 -4.2132269666 -0.3441189699  
H 0.9695041803 -4.9051958477 2.2860947366  
H 2.3721028109 -6.8466343328 1.5961257938  
H -2.3108384614 2.5428731674 4.2110368324  
H -3.7764369204 1.0208933509 5.5276950985  
H -3.3966187512 -1.4302932334 5.5251138923  
H -1.5329187667 -2.4344481521 4.2147866408  
H 6.9811031741 -1.0853359137 -2.0475579942  
H 8.3558258293 0.4086484374 -3.495363356  
H 7.757286442 2.794625645 -3.7894808676  
H 5.7670111003 3.7647940898 -2.6460890321  
H 1.4271470461 8.0727097266 -0.6305004203  
H -0.4329158641 7.7989343854 0.9756207013

|   |               |               |               |
|---|---------------|---------------|---------------|
| H | -0.8970525026 | 5.5785931285  | 2.0286865927  |
| O | 3.2223881649  | 0.9079327988  | 2.2798016648  |
| O | 1.1096217419  | 0.4512236906  | -0.498140208  |
| C | 1.3849198867  | -0.3159580358 | -1.6389536891 |
| C | 0.1106564584  | -0.5474121778 | -2.4416326719 |
| C | -1.0180648107 | -1.1817037716 | -1.6157137455 |
| C | -1.7828630128 | -0.1041398109 | -0.8599207104 |
| N | -3.0480173435 | -0.5323685066 | -0.1518649837 |
| C | -4.1656635766 | -0.9388447357 | -1.088407956  |
| C | -4.50571981   | -0.0054810829 | -2.2541194726 |
| C | -3.777242617  | -0.2310984269 | -3.5788709141 |
| S | -4.1015800398 | -1.8357707648 | -4.3608971057 |
| O | -5.5976386112 | -1.9623596391 | -4.4398881545 |
| O | -3.4390515515 | -1.7522895876 | -5.7068680094 |
| O | -3.4778794141 | -2.8795779005 | -3.4691472114 |
| C | -2.7441799192 | -1.6845543681 | 0.7993244172  |
| C | -2.7850932017 | -3.1085129827 | 0.2547612271  |
| C | -2.0914911349 | -4.0098698143 | 1.2710725139  |
| S | -1.9623667845 | -5.72143093   | 0.703634513   |
| O | -1.2589646765 | -6.4476912538 | 1.8175571785  |
| O | -3.3718331414 | -6.2017783349 | 0.4854976887  |
| O | -1.1608115261 | -5.6744614441 | -0.5690631627 |
| C | -3.4630403669 | 0.5985736512  | 0.7793853203  |
| C | -3.6828696894 | 1.9913528595  | 0.1942110324  |
| C | -3.5421545035 | 3.0165678199  | 1.3150026705  |
| S | -4.0479091886 | 4.6714618921  | 0.789532825   |
| O | -3.2396123248 | 4.9851335313  | -0.4398279528 |
| O | -3.7282921365 | 5.5668587709  | 1.9552789283  |
| O | -5.5237760172 | 4.584218299   | 0.5046029552  |
| H | 2.1350903084  | 0.1783102806  | -2.2855830203 |
| H | 1.797467383   | -1.3062514328 | -1.3664974372 |
| H | -0.2317657467 | 0.4038043023  | -2.8842215297 |
| H | 0.3593293724  | -1.2121012262 | -3.2829509054 |
| H | -1.6943416103 | -1.7426453186 | -2.2769777279 |
| H | -0.5724587244 | -1.9021950693 | -0.9119155731 |
| H | -1.1337669933 | 0.3395758586  | -0.0948438954 |

|   |               |               |               |
|---|---------------|---------------|---------------|
| H | -2.0701237845 | 0.6950380016  | -1.5513510451 |
| H | -5.0423279418 | -1.0625659996 | -0.4403411894 |
| H | -3.9038376174 | -1.9197982823 | -1.4950572746 |
| H | -4.3910595895 | 1.050112093   | -1.9850427293 |
| H | -5.5805938097 | -0.1423871972 | -2.4403719308 |
| H | -4.1213899248 | 0.5093150906  | -4.3133355416 |
| H | -2.6846813998 | -0.1513144887 | -3.5127708133 |
| H | -3.4599663487 | -1.5992042484 | 1.6264758861  |
| H | -1.7500583673 | -1.458354861  | 1.2019289751  |
| H | -2.2734978871 | -3.2005465522 | -0.7098076167 |
| H | -3.8216380328 | -3.4430796283 | 0.1145106609  |
| H | -2.633162592  | -4.0481216933 | 2.2270904424  |
| H | -1.0594247431 | -3.6813181218 | 1.4668738867  |
| H | -4.3756152865 | 0.2559244441  | 1.283430482   |
| H | -2.6637183739 | 0.6415890114  | 1.5302882208  |
| H | -2.948298487  | 2.23732911    | -0.5825983245 |
| H | -4.6857107847 | 2.0709863513  | -0.2459435645 |
| H | -4.1760930989 | 2.7757807391  | 2.1807048783  |
| H | -2.4975628188 | 3.10898967    | 1.6494985346  |
| H | 3.3382441639  | 1.8372155524  | 2.4889999057  |

Geometry optimized cartesian coordinates of SiPc(OH)<sub>2</sub> (neutral).

E=-2108.010805 (radical: -2108.143028) / qh-G(298.15K)=-2107.615651 (wb97X-D/(aug-)cc-pVDZ, water solv.)

|    |               |               |               |
|----|---------------|---------------|---------------|
| C  | -6.4765850112 | -0.5326356529 | 0.4703105352  |
| C  | -5.2924918094 | -1.2546943976 | 0.3747684241  |
| C  | -4.1046536401 | -0.5266102157 | 0.2793899881  |
| C  | -4.1049510256 | 0.8714558796  | 0.2822480812  |
| C  | -5.2929010051 | 1.5992974586  | 0.3800240665  |
| C  | -6.4768344076 | 0.8767394726  | 0.4729299278  |
| C  | -2.7151085497 | -0.9362031065 | 0.1719533343  |
| N  | -1.9113441154 | 0.1731334106  | 0.0979374621  |
| C  | -2.7152604842 | 1.2808894105  | 0.1753085911  |
| N  | -2.3457482112 | -2.2018080368 | 0.1664311386  |
| C  | -1.0818065945 | -2.5695200855 | 0.094594256   |
| Si | 0.0295324924  | 0.181888029   | -0.0092818622 |

|   |               |               |               |
|---|---------------|---------------|---------------|
| N | 0.0222062951  | 2.1098685587  | 0.0100020168  |
| C | 1.1258801563  | 2.9151365892  | -0.0756142663 |
| C | 0.7184376326  | 4.3106795821  | -0.0389996405 |
| C | -0.6750757616 | 4.3099901028  | 0.0666772726  |
| C | -1.0833909335 | 2.9144632811  | 0.0907229329  |
| C | 1.4443930702  | 5.5017277197  | -0.0915348215 |
| C | 0.7238677647  | 6.6899031028  | -0.0331716353 |
| C | -0.6807791102 | 6.6892903788  | 0.073154237   |
| C | -1.4011428718 | 5.5005945036  | 0.1237716955  |
| N | -2.3467044183 | 2.5475037392  | 0.1686489783  |
| C | -0.6729772703 | -3.9631191767 | 0.0598814075  |
| C | 0.7210369354  | -3.9617861804 | -0.0464077894 |
| C | 1.1290288696  | -2.5678933119 | -0.0728184619 |
| N | 0.025190688   | -1.7614995285 | 0.0267616977  |
| C | -1.39849369   | -5.1555769276 | 0.1066922883  |
| C | -0.6775887753 | -6.3426211095 | 0.0457371261  |
| C | 0.7277339585  | -6.3413354854 | -0.0611668222 |
| C | 1.4472977444  | -5.1528941412 | -0.1097285243 |
| N | 2.3904392559  | -2.1989966915 | -0.1868758402 |
| N | 1.9508767958  | 0.17496114    | -0.169599221  |
| C | 2.7544497329  | -0.9331387864 | -0.2288173058 |
| C | 4.1455567845  | -0.5233949559 | -0.3376696224 |
| C | 4.1444930329  | 0.8741118157  | -0.3340005186 |
| C | 2.7531527275  | 1.2823234504  | -0.2242578023 |
| C | 5.3335280097  | -1.2504617382 | -0.4296600269 |
| C | 6.5178340017  | -0.5268156334 | -0.5197889    |
| C | 6.5167933621  | 0.8818552887  | -0.5164199077 |
| C | 5.331337816   | 1.6031951994  | -0.4228430708 |
| N | 2.3879851245  | 2.5488109047  | -0.1828668521 |
| H | 5.3287492388  | -2.3407891263 | -0.4309125239 |
| O | 0.1410173383  | 0.2628198089  | 1.7296015013  |
| O | -0.0174846421 | 0.1653789482  | -1.7529772302 |
| H | -7.4265779788 | -1.0637973449 | 0.545440202   |
| H | -5.2870769104 | -2.3449199266 | 0.3737507548  |
| H | -5.2871470264 | 2.6896162984  | 0.3830785985  |
| H | -7.4268801104 | 1.4074577071  | 0.550151679   |

|   |               |               |               |
|---|---------------|---------------|---------------|
| H | 2.5315272148  | 5.4962736207  | -0.1748646785 |
| H | 1.2534042533  | 7.6430004683  | -0.070567507  |
| H | -1.2105466054 | 7.6420505547  | 0.1161156977  |
| H | -2.488325015  | 5.4949366968  | 0.2051459257  |
| H | -2.4857879118 | -5.1509399598 | 0.18803137    |
| H | -1.2065788937 | -7.2961311903 | 0.0805801716  |
| H | 1.2575462594  | -7.2939350336 | -0.1069960884 |
| H | 2.5342666422  | -5.1464958665 | -0.1938328877 |
| H | 7.4682992069  | -1.0571511604 | -0.5944615331 |
| H | 7.4665363678  | 1.4138644999  | -0.5884505728 |
| H | 5.3251786356  | 2.6934036791  | -0.4188701178 |
| H | -0.9067925557 | 0.1666808821  | -2.1139545452 |
| H | 0.1721759141  | -0.5977835749 | 2.1534491245  |

Geometry optimized cartesian coordinates of SiPc(OH)<sub>2</sub> (radical).

E=-2108.149222 / qh-G(298.15K)=-2107.758009 (wB97X-D/(aug-)cc-pVDZ, water solv.)

|    |               |               |               |
|----|---------------|---------------|---------------|
| C  | -6.4953294872 | -0.5300768071 | 0.4400056948  |
| C  | -5.3058973934 | -1.2499283572 | 0.3520943324  |
| C  | -4.1188280683 | -0.5239805858 | 0.2640806191  |
| C  | -4.1187819714 | 0.869780732   | 0.2663106086  |
| C  | -5.3056340822 | 1.5958452386  | 0.3562968244  |
| C  | -6.4952624902 | 0.8760950502  | 0.4421024907  |
| C  | -2.7202949479 | -0.9443178763 | 0.1661798015  |
| N  | -1.9101799986 | 0.1742981116  | 0.090657975   |
| C  | -2.7202228123 | 1.290172181   | 0.1690599564  |
| N  | -2.3698915346 | -2.1969007557 | 0.1721464717  |
| C  | -1.0807034452 | -2.5774001239 | 0.099633336   |
| Si | 0.0317882825  | 0.1829954503  | -0.0109501154 |
| N  | 0.0244019548  | 2.1164549401  | 0.0181774152  |
| C  | 1.1291118673  | 2.9248502795  | -0.0623628992 |
| C  | 0.726294829   | 4.2978057824  | -0.0205448038 |
| C  | -0.6794077108 | 4.2968174993  | 0.0824528686  |
| C  | -1.0823545435 | 2.9233852387  | 0.0997127349  |
| C  | 1.4462450662  | 5.5057934947  | -0.0656481657 |
| C  | 0.7307297611  | 6.687970835   | -0.004189118  |
| C  | -0.6844112578 | 6.686993696   | 0.0994853335  |

|   |               |               |               |
|---|---------------|---------------|---------------|
| C | -1.3997784147 | 5.5039240674  | 0.1427625822  |
| N | -2.3706516491 | 2.5442355148  | 0.1739863466  |
| C | -0.6767484979 | -3.948220448  | 0.0755926862  |
| C | 0.7298311629  | -3.9478308545 | -0.0304298317 |
| C | 1.1318733229  | -2.5766943292 | -0.0667955834 |
| N | 0.0263615192  | -1.7673922481 | 0.021882536   |
| C | -1.3960082435 | -5.1576168002 | 0.1303461608  |
| C | -0.6803395853 | -6.3391185369 | 0.0786583239  |
| C | 0.7356687842  | -6.3386891417 | -0.0280697383 |
| C | 1.450088516   | -5.1566279065 | -0.0840417858 |
| N | 2.4173437669  | -2.1946565005 | -0.186706967  |
| N | 1.9506876629  | 0.176171281   | -0.1761449275 |
| C | 2.7605549022  | -0.9409717019 | -0.2367217115 |
| C | 4.1581468153  | -0.5200491226 | -0.3553113259 |
| C | 4.157555089   | 0.8733853692  | -0.349771118  |
| C | 2.7594807951  | 1.2920019051  | -0.2293329645 |
| C | 5.3443496465  | -1.2450674505 | -0.4559721094 |
| C | 6.5327309213  | -0.5240955766 | -0.5534263521 |
| C | 6.5320724394  | 0.8817618976  | -0.5479421381 |
| C | 5.342878614   | 1.6005733195  | -0.4449585742 |
| N | 2.4148854131  | 2.5464805084  | -0.1774247261 |
| H | 5.3391168264  | -2.3357465917 | -0.4585780151 |
| O | 0.1436368034  | 0.2442714455  | 1.7451232752  |
| O | -0.0318635475 | 0.1735647216  | -1.7701486445 |
| H | -7.4448222408 | -1.0635014173 | 0.5092065195  |
| H | -5.2999840324 | -2.3406067989 | 0.3518458927  |
| H | -5.2993201408 | 2.6865144657  | 0.3593449648  |
| H | -7.4446572615 | 1.4094545176  | 0.512980762   |
| H | 2.5344399804  | 5.5047543338  | -0.146158622  |
| H | 1.2591053147  | 7.6426430148  | -0.0359093664 |
| H | -1.2130469056 | 7.6409570895  | 0.1452834453  |
| H | -2.488091735  | 5.501548433   | 0.221634333   |
| H | -2.4842164875 | -5.1565793772 | 0.2111486547  |
| H | -1.2080557739 | -7.2938355808 | 0.1197094951  |
| H | 1.2642073359  | -7.2930425273 | -0.0667186702 |
| H | 2.5381168749  | -5.1546863783 | -0.1671664507 |

|   |               |               |               |
|---|---------------|---------------|---------------|
| H | 7.4816397463  | -1.0567830123 | -0.6352051528 |
| H | 7.4804344308  | 1.4160403939  | -0.6254489301 |
| H | 5.3362998545  | 2.6912251939  | -0.4390414276 |
| H | -0.9357319303 | 0.1697883278  | -2.0921565418 |
| H | 0.173155877   | -0.6337836853 | 2.1312542432  |



## REFERENCE

- [1] H. Takakura, S. Matsuhira, M. Kobayashi, Y. Goto, M. Harada, T. Taketsugu, M. Ogawa, *Journal of Photochemistry and Photobiology A: Chemistry* **2022**, 426, 113749.
- [2] M. J. Frisch, G. W. Trucks, H. B. Schlegel, G. E. Scuseria, M. A. Robb, J. R. Cheeseman, G. Scalmani, V. Barone, G. A. Petersson, H. Nakatsuji, X. Li, M. Caricato, A. V. Marenich, J. Bloino, B. G. Janesko, R. Gomperts, B. Mennucci, H. P. Hratchian, J. V. Ortiz, A. F. Izmaylov, J. L. Sonnenberg, Williams, F. Ding, F. Lipparini, F. Egidi, J. Goings, B. Peng, A. Petrone, T. Henderson, D. Ranasinghe, V. G. Zakrzewski, J. Gao, N. Rega, G. Zheng, W. Liang, M. Hada, M. Ehara, K. Toyota, R. Fukuda, J. Hasegawa, M. Ishida, T. Nakajima, Y. Honda, O. Kitao, H. Nakai, T. Vreven, K. Throssell, J. A. Montgomery Jr., J. E. Peralta, F. Ogliaro, M. J. Bearpark, J. J. Heyd, E. N. Brothers, K. N. Kudin, V. N. Staroverov, T. A. Keith, R. Kobayashi, J. Normand, K. Raghavachari, A. P. Rendell, J. C. Burant, S. S. Iyengar, J. Tomasi, M. Cossi, J. M. Millam, M. Klene, C. Adamo, R. Cammi, J. W. Ochterski, R. L. Martin, K. Morokuma, O. Farkas, J. B. Foresman, D. J. Fox, Wallingford, CT, **2016**.
- [3] J. D. Chai, M. Head-Gordon, *Phys Chem Chem Phys* **2008**, 10, 6615-6620.
- [4] R. A. Kendall, T. H. Dunning, R. J. Harrison, *The Journal of Chemical Physics* **1992**, 96, 6796-6806.
- [5] T. H. Dunning, *The Journal of Chemical Physics* **1989**, 90, 1007-1023.
- [6] D. E. Woon, T. H. Dunning, *The Journal of Chemical Physics* **1993**, 98, 1358-1371.
- [7] B. Mennucci, E. Cancès, J. Tomasi, *The Journal of Physical Chemistry B* **1997**, 101, 10506-10517.
- [8] S. Grimme, *Chemistry* **2012**, 18, 9955-9964.
- [9] G. Luchini, J. V. Alegre-Requena, I. Funes-Ardoiz, R. S. Paton, *F1000Research* **2020**, 9, 291.
